# Supplementary material
Source: Royal Society of Chemistry journal article supplement (doi:10.1039/d6qi00263c)
Supplement: d6qi00263c1.pdf [file d6qi00263c1.pdf]

## Supporting Information

### **Facile Synthesis of MOF-Derived Ru-Doped Cobalt Oxide/Carbon Nanomaterials for Electrocatalytic Oxygen Evolution**

Nan Li,<sup>a,#</sup> Rong Lin,<sup>a,#</sup> Yuchang Shen,<sup>a</sup> Haoran Wang,<sup>a</sup> Yuting Fu,<sup>a</sup>

Qipeng Li,<sup>b,\*</sup> and Jinjie Qian<sup>a,\*</sup>

<sup>a</sup>Key Laboratory of Carbon Materials of Zhejiang Province, College of Chemistry and Materials Engineering, Wenzhou University, Wenzhou 325035, Zhejiang, P. R. China

<sup>b</sup>College of Chemistry and Chemical Engineering, Zhaotong University, Zhaotong 657000, Yunnan, P. R. China

<sup>#</sup>These authors contributed equally to this work.

\*Corresponding author

E-mail: [qpli@ztu.edu.cn](mailto:qpli@ztu.edu.cn) (Q. Li); [jinjieqian@wzu.edu.cn](mailto:jinjieqian@wzu.edu.cn) (J. Qian)

## 1. Experimental Details

### 1.1 Reagents and Materials.

Unless otherwise specified, chemicals are reagent grade and used directly without processing. Cobalt(II) acetate tetrahydrate ( $\text{Co}(\text{CH}_3\text{COO})_2 \cdot 4\text{H}_2\text{O}$ , 99.5%, Aladdin), biphenyl-3,3',5,5'-tetra carboxylic acid ( $\text{H}_4\text{BPTC}$ , 98.0%, Jinan Henghua Technology Company), polyvinylpyrrolidone (PVP, ~58000, Aladdin), Ruthenium(III) chloride anhydrous ( $\text{RuCl}_3$ , Aladdin), N-Methylformamide (NMF, 99%, Aladdin), de-ionized water (18 M $\Omega$ ), concentrated nitric acid solution ( $\text{HNO}_3$ , 70%, Aladdin), and ethanol (EtOH, 95%, Aladdin).

### 1.2 Synthesis of CoOF-1 ( $[\text{Co}_2(\text{OH})_2(\text{BPTC})]$ )

The mixture of  $\text{Co}(\text{CH}_3\text{COO})_2 \cdot 4\text{H}_2\text{O}$  (30 mg, 0.12 mmol),  $\text{H}_4\text{BPTC}$  (0.05 mmol, 15 mg), NMF (2 mL), and EtOH (1 mL) was added to a 35 mL pressure-resistant tube. Meanwhile,  $\text{HNO}_3$  solution (0.3 mL) can adjust the mixture to be acidic condition. The reaction is then in an aluminum block bath to 140 °C for 4 hours. After cooling to room temperature, the product was centrifuged and collected, washed three

times with EtOH solution, and then the filtered solid was dried under vacuum at 85 °C overnight to obtain pure CoOF-1 in high yield.

### **1.3 Synthesis of CoOF-1-Co/C**

The obtained CoOF-1 is weighed and placed in the a CVD tube furnace for the following thermal treatment. The temperature is set to 850 °C at a heating rate of 10 °C min<sup>-1</sup> under an N<sub>2</sub> (50 sccm) atmosphere, and it is maintained at a constant temperature for another 2 hours. The black powders are obtained after falling to room temperature, denoted as CoOF-1-Co/C.

### **1.4 Synthesis of CoOF-1-RuCo/C**

A mixture of Co/C (30 mg) and ethanol (3 mL) was added to a 35 mL pressure-resistant tube. Subsequently, 300 μL of RuCl<sub>3</sub> solution (Ru wt.% = 5 mg mL<sup>-1</sup>) was transferred into the aforementioned mixture. The reaction was then carried out at 140 °C in an aluminum block bath for 4 hours. After naturally cooling to room temperature, the product was collected by centrifugation, washed three times with ethanol, and filtered. The resulting solid was dried overnight under vacuum at 85 °C to obtain CoOF-1-RuCo/C.

## 1.5 Synthesis of CoOF-1-RuCoO/C

The prepared CoOF-1-RuCo/C was weighed and placed in a muffle furnace. Subsequently, it was oxidized at different temperatures (200°C, 250°C, 300°C, and 350°C, respectively) in an air atmosphere, with a heating rate of 5°C min<sup>-1</sup>, and maintained for 2 hours. After cooling to room temperature, a black powder was obtained. The final products were named CoOF-1-RuCo/C-x (x = 200, 250, 300, 350) based on the oxidation temperature. The sample primarily characterized in this study is CoOF-1-RuCo/C-250, referred to as CoOF-1-RuCo/C for simplicity.

## 2. Material Characterization

The microscopic and nanostructured morphologies of all samples are characterized by scanning electron microscopy (SEM, JEOL JSM-6700F, 10 kV). The powder X-ray diffraction (PXRD) patterns are collected on a Bruker D8 Advance at 40 kV and 40 mA with Cu K $\alpha$  radiation ( $\lambda=0.154$  nm). Thermogravimetric analysis (TGA) is implemented under a flowing N<sub>2</sub> atmosphere by using a NETZSCH STA 449C unit. Raman spectrometer is investigated on LabRAM HR Evolution from the 532 nm line of an Ar-ion laser. X-ray photoelectron spectroscopy (XPS) is

recorded on a Thermo Scientific ESCALAB 250. Fourier transform infrared spectroscopy (FT-IR) spectra are carried on in the model of PerkinElmer Frontier MIR. N<sub>2</sub> adsorption/desorption isotherms are used to characterize the determine specific surface areas and pore distribution of samples based on the Brunauer-Emmett-Teller method (BET, Micrometrics ASAP 2020 system).

### **3. Electrochemical measurements**

All electrochemical data were collected via the CHI760E and/or Autolab electrochemical workstation. OER measurements were performed in 1.0 M KOH solution using a typical three-electrode system, the GCE (glassy carbon electrode) with catalyst ink (geometric area: 1.5 cm<sup>2</sup>), platinum mesh (geometric area: 0.0706 cm<sup>2</sup>), and Hg/Hg<sub>2</sub>Cl<sub>2</sub> electrode as the working electrode, counter electrode, and reference electrode, respectively. At the same time, we chose Hg/Hg<sub>2</sub>Cl<sub>2</sub> as the reference electrode to ensure accuracy and reproducibility in alkaline media. All electrochemical tests in our work were performed without iR correction.

Briefly, the homogeneous catalyst ink was prepared by dispersing

2.5mg of catalyst powder into a mixed solution containing 75  $\mu\text{L}$  of DI  $\text{H}_2\text{O}$ , 150  $\mu\text{L}$  of ethanol and 25  $\mu\text{L}$  of Nafion (5 wt.%), and then underwent an ultrasonic treatment for 1 h. 6  $\mu\text{L}$  of the resultant catalyst ink was drop-casted onto the GCE electrode surface with a loading value of 0.85  $\text{mg cm}^{-2}$ , and dried at room temperature. As a comparison, commercial  $\text{RuO}_2$  also was tested. The linear sweep voltammetry (LSV) is collected with a scan rate of 5  $\text{mV s}^{-1}$  after initial 40 circles cyclic voltammogram (CV) progress at a scan rate of 100  $\text{mV s}^{-1}$  to have a stable CV curve. The electrochemical double-layer capacitance ( $C_{dl}$ ) is measured by using CV in a non-Faradaic region (0.91-1.01 V vs. RHE) at different scan rates of 20, 40, 60, 80 and 120  $\text{mV s}^{-1}$ . Electrocatalytic stability is made by using Amperometric curve (i-t) at a potential of 1.5 V vs. RHE for 48 h. In order to calculate the electron transfer number (N), rotating ring-disk electrode (RRDE) voltammogram of as-prepared samples are conducted to collect disk current ( $I_{\text{disk}}$ ) and ring current ( $I_{\text{ring}}$ ) at the same time, equation as follows:  $N=4 \times I_d / (I_d + I_r / N_c)$ , where  $I_r$  is the ring current,  $I_d$  is the disk current, and  $N_c$  is the current collection efficiency. The Faradaic efficiency ( $\epsilon$ ) is calculated by the equation as

follows:  $\varepsilon = I_r / (I_d \cdot N_c)$ .

#### 4. Computational details

The density functional theory was used to carry out all the calculations with the Perdew-Burke-Ernzerh exchange-correlation functional of generalized gradient approximation and the projector-augmented wave method, which was implemented through Vienna Ab-initio Simulation Package (VASP). The input model structure file was created by VESTA.<sup>1</sup> The plane wave-basis expansion cutoff energy was fixed at 500 eV, and atomic relaxation was conducted until the force exerted on atoms was less than 0.05 eV Å<sup>-1</sup> and energy was concurrently converged to 1×10<sup>-5</sup> eV. The k-point was a Monkhorst-Pack of 3×3×1.

The Gibbs free energy change ( $\Delta G$ ) of each lithiation step was defined as:

$$\Delta G = \Delta E + \Delta ZPE - T\Delta S,$$

where  $\Delta E$  is the electronic energy difference directly obtained from DFT calculations,  $\Delta ZPE$  is the change in zero-point energy,  $T$  is the temperature ( $T = 298.15$  K) and  $\Delta S$  is the change in the entropy, respectively.<sup>2</sup> The zero-point energy and entropy were obtained through vibrational frequencies.

Conventionally, in an alkaline electrolyte, the anode reactions after oxygen adsorption can be written as:

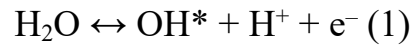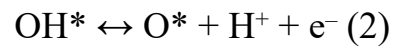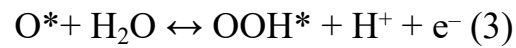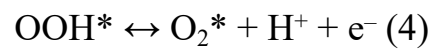

[1]K. Momma, F. Izumi. VESTA 3 for three-dimensional visualization of crystal, volumetric and morphology data. J. Appl. Cryst., 2011, 44 , 1272-1276.

[2]J. Cao, X. Zhang, S. Zhao, X. Lu, H. Ma. Mechanism of the two-dimensional WSeTe/Zr<sub>2</sub>CO<sub>2</sub> direct Z-scheme van der Waals heterojunction as a photocatalyst for water splitting. Phys. Chem. Chem. Phys., 2022, 24 , 21030-21039.

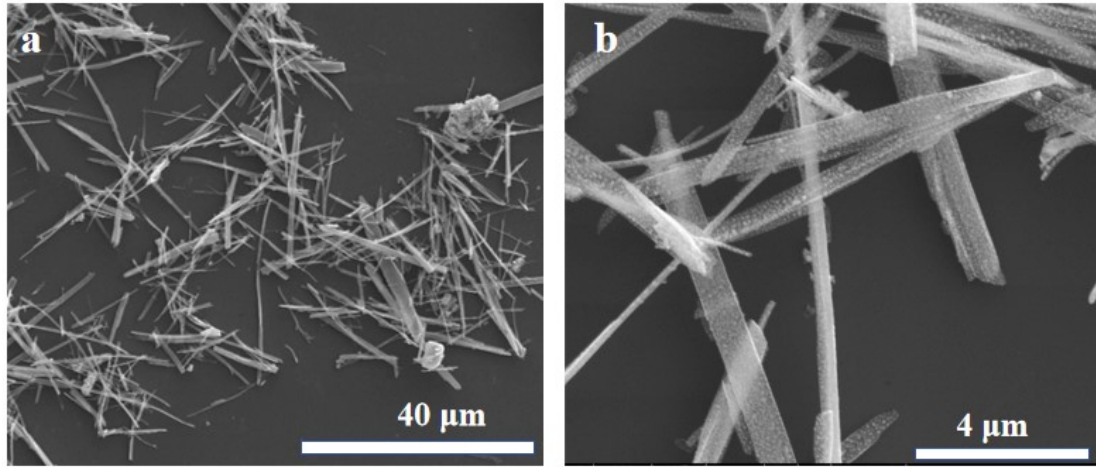

**Fig. S1** SEM images of CoOF-1-Co/C.

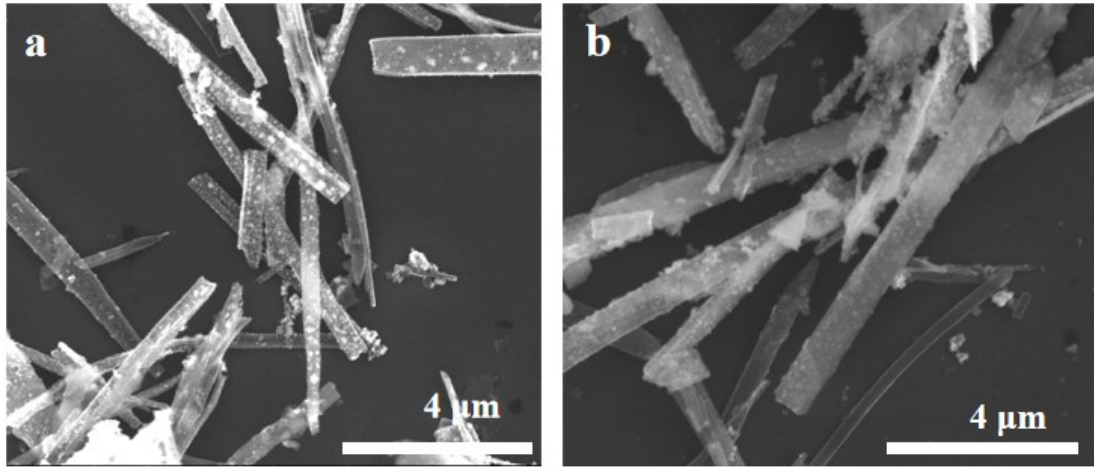

**Fig. S2** SEM images of CoOF-1-RuCo/C.

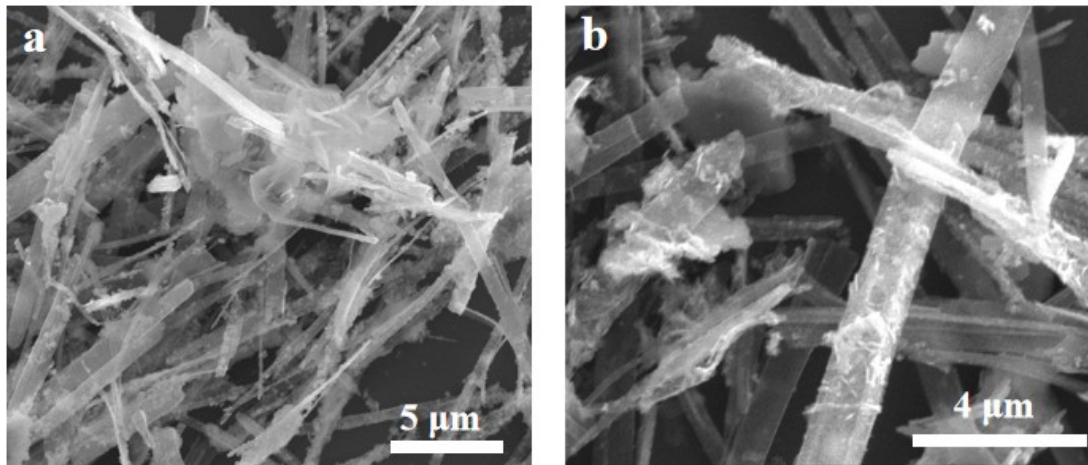

**Fig. S3** SEM images of CoOF-1-RuCoO/C.

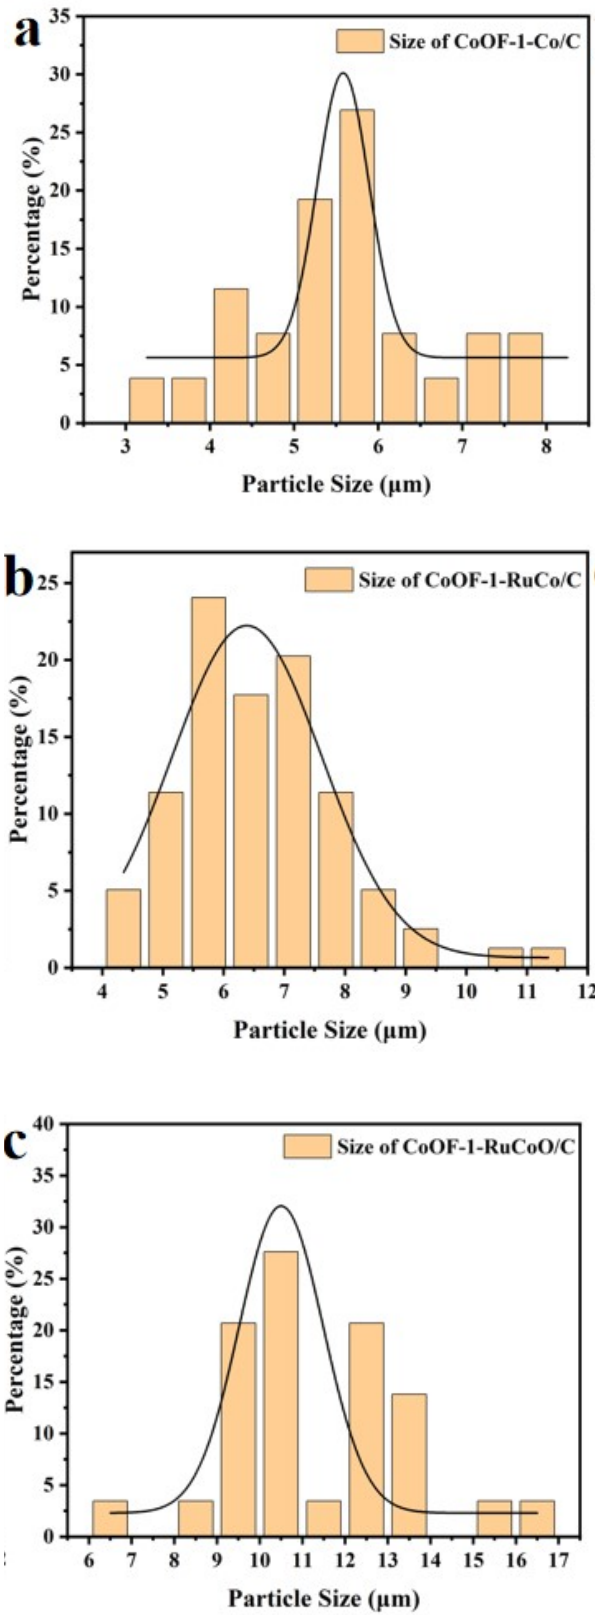

**Fig. S4** Particle size distribution of (a) CoOF-1-Co/C, (b) CoOF-1-RuCo/C, (c) CoOF-1-RuCoO/C.

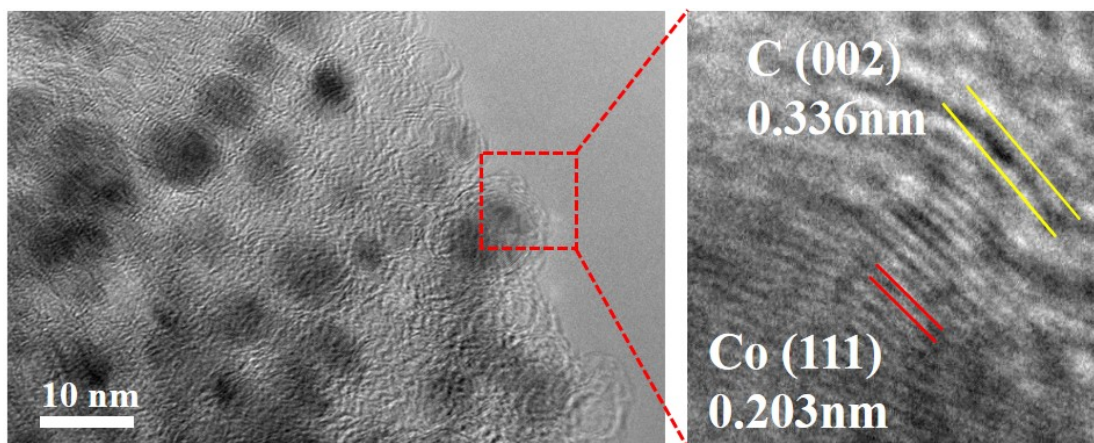

**Fig. S5** TEM and HR-TEM images of CoOF-1-Co/C.

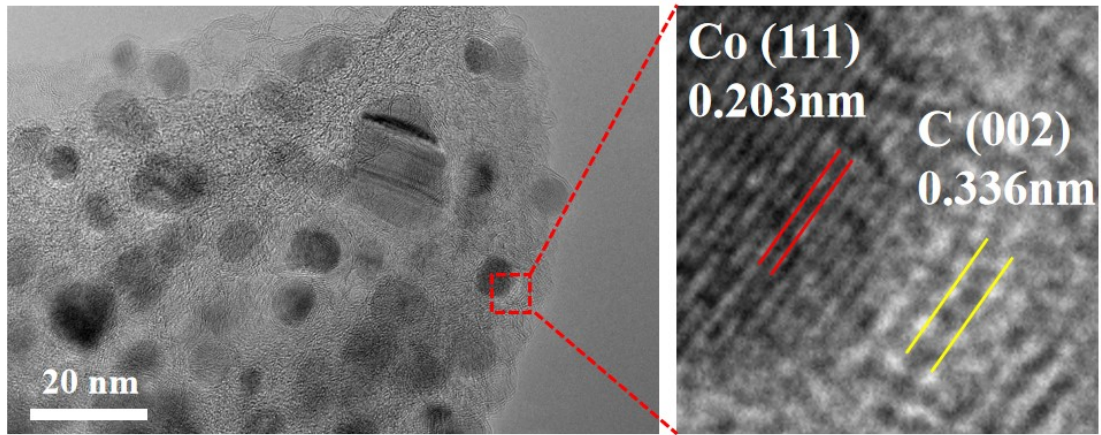

**Fig. S6** TEM and HR-TEM images of CoOF-1-RuCo/C.

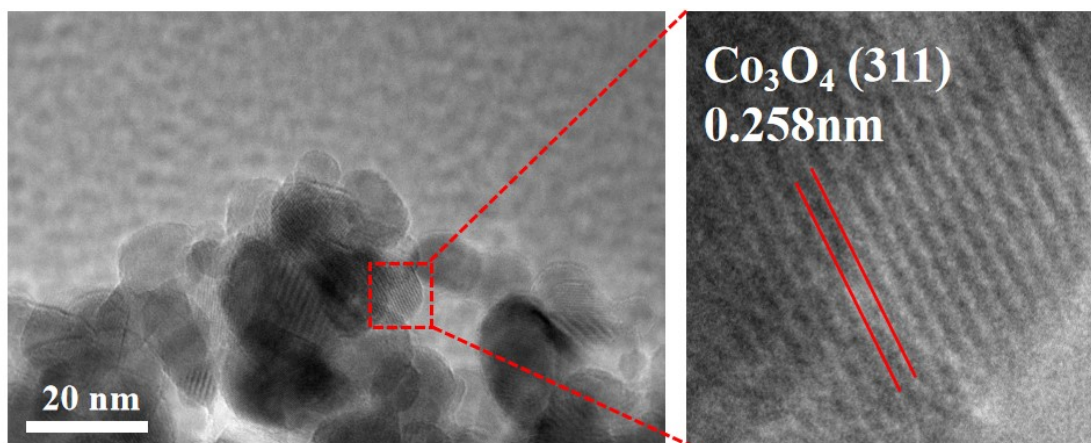

**Fig. S7** TEM and HR-TEM images of CoOF-1-RuCoO/C.

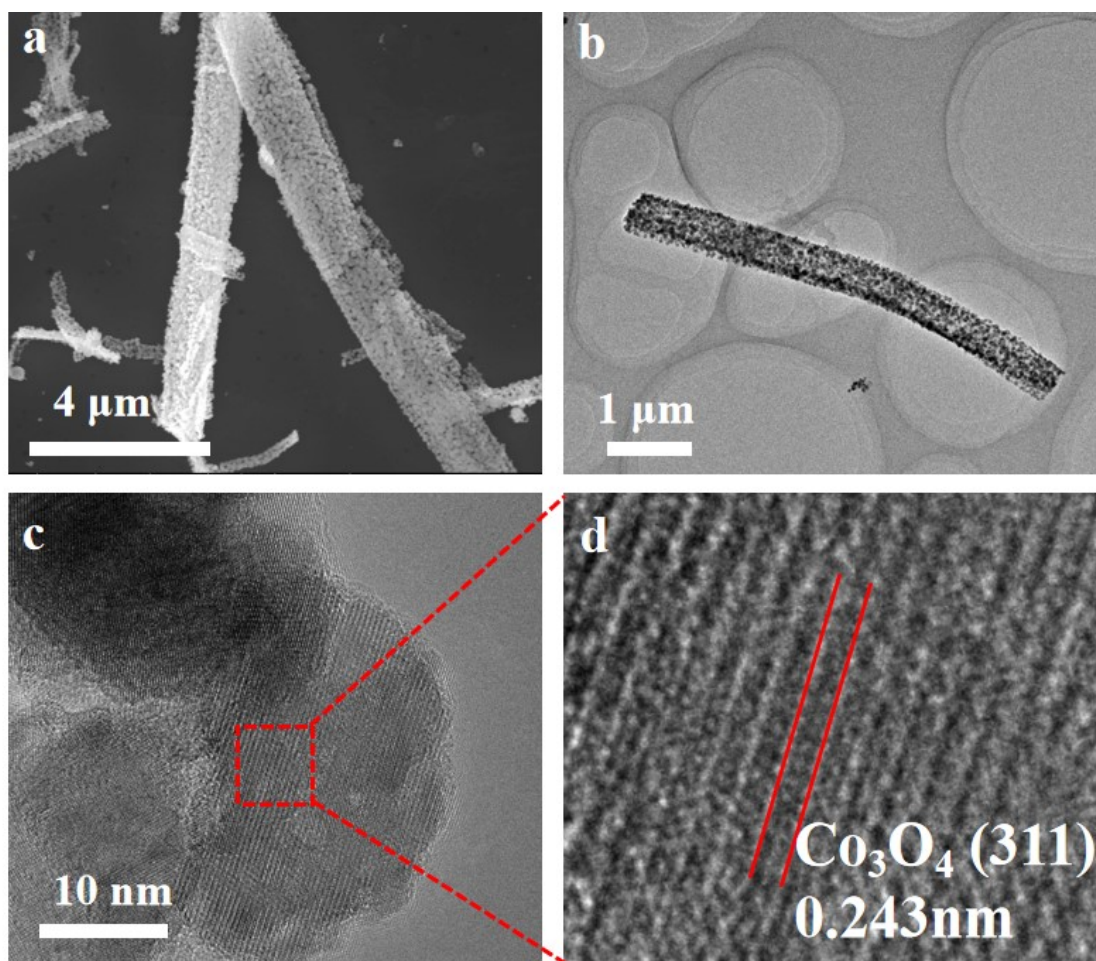

**Fig. S8** SEM, TEM and HR-TEM images of CoOF-1-derived Co<sub>3</sub>O<sub>4</sub> (CoOF-1-CoO).

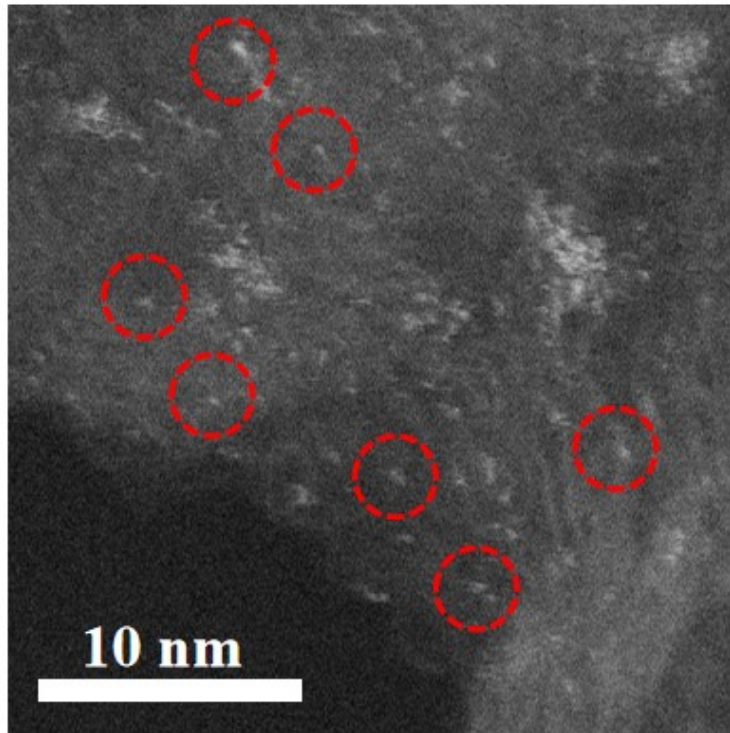

**Fig. S9** AC-HAADF-STEM image of CoOF-1-RuCoO/C.

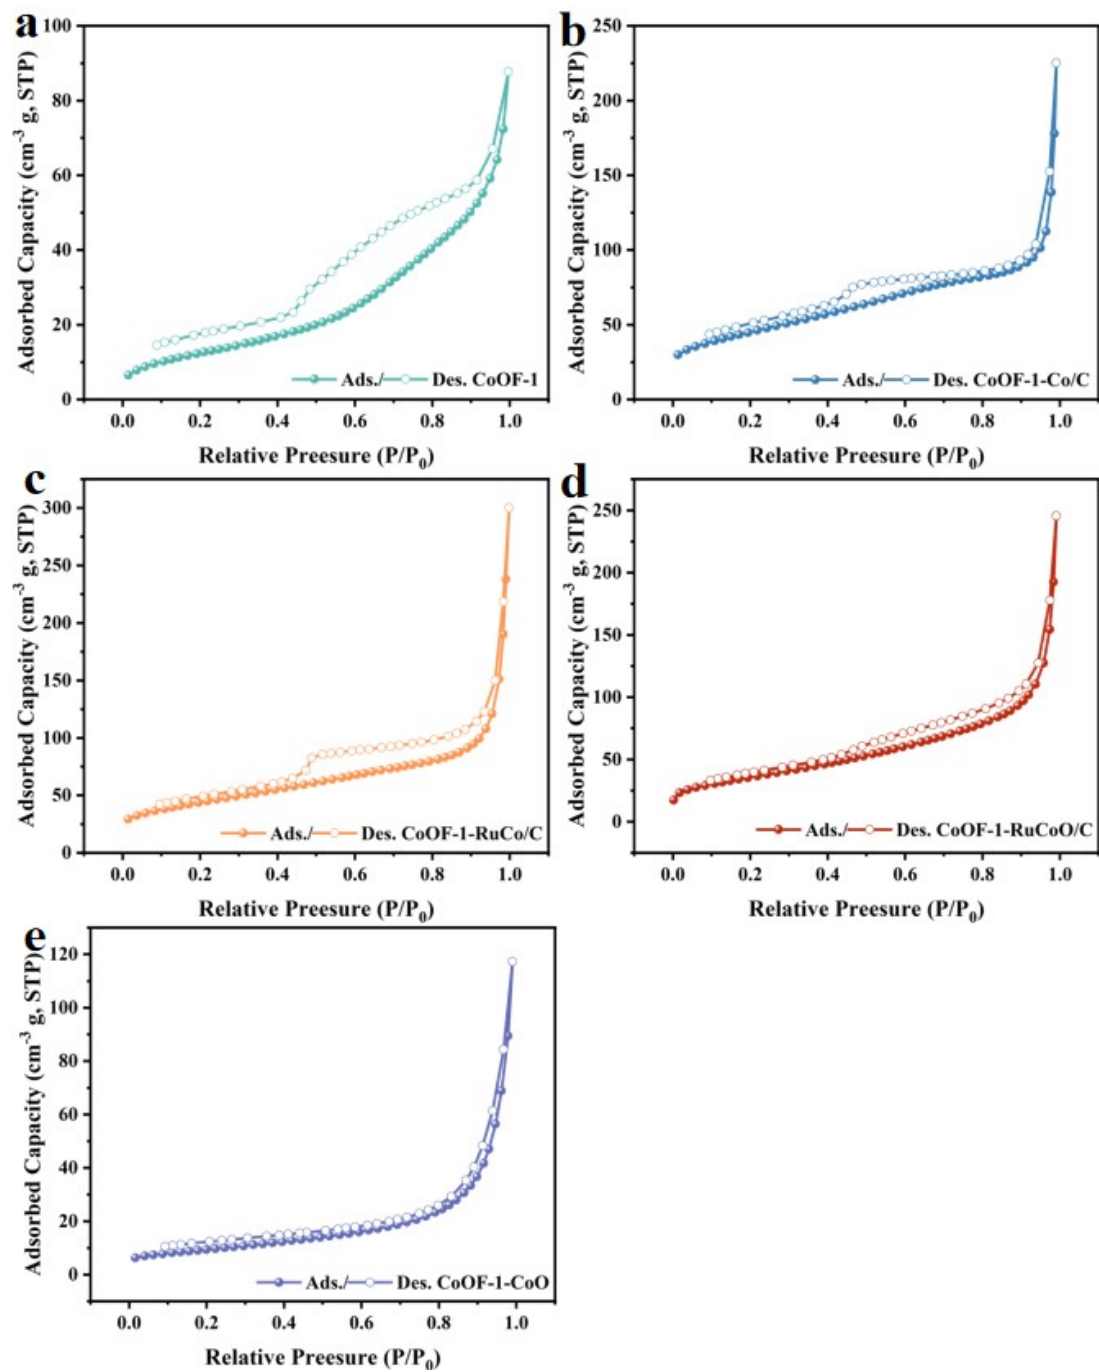

**Fig. S10**  $N_2$  adsorption/desorption isotherms of (a) CoOF-1, (b) CoOF-1-Co/C, (c) CoOF-1-RuCo/C, (d) CoOF-1-RuCoO/C, and (e) CoOF-1-CoO.

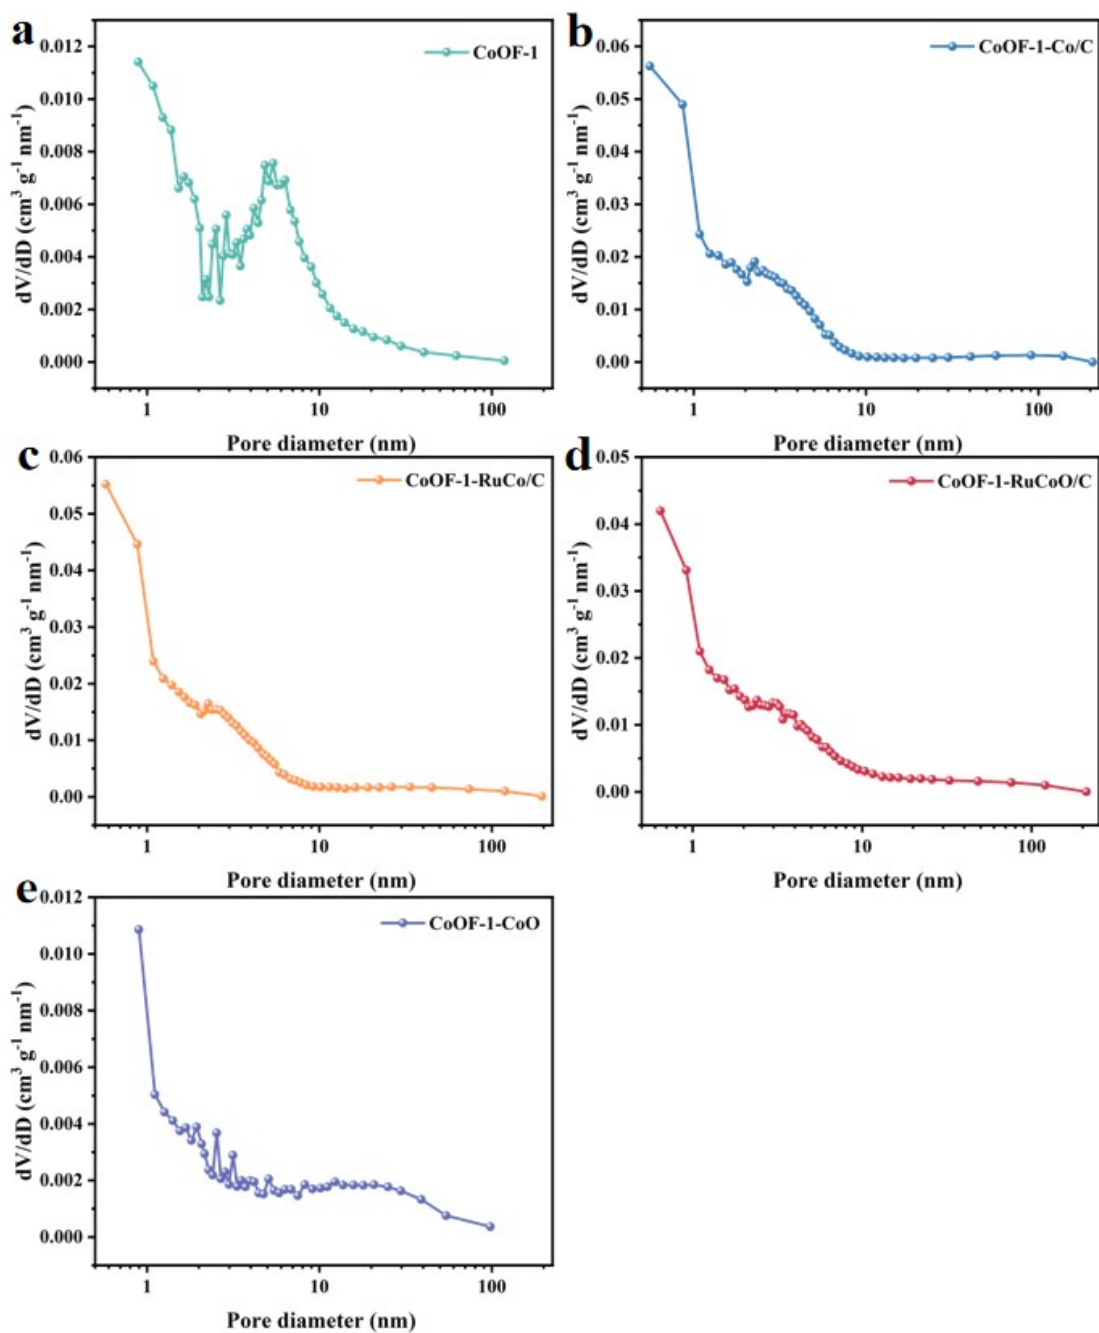

**Fig. S11** PSD curves of (a) CoOF-1, (b) CoOF-1-Co/C, (c) CoOF-1-RuCo/C, (d) CoOF-1-RuCoO/C, and (e) CoOF-1-CoO.

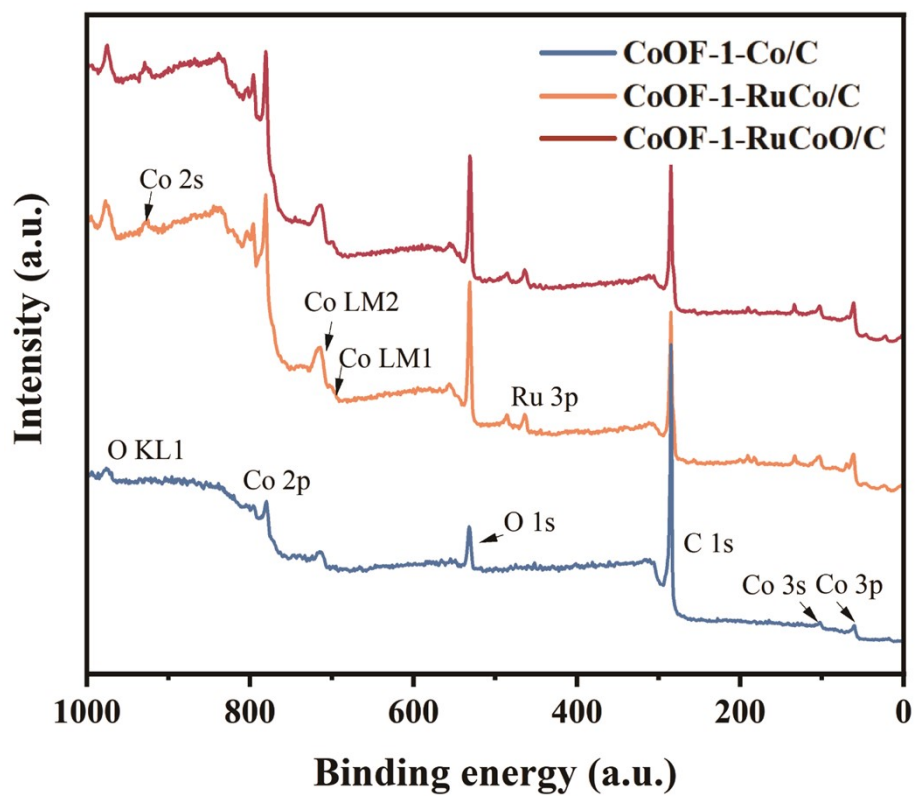

**Fig. S12** XPS full spectra of CoOF-1-Co/C, CoOF-1-RuCo/C, and CoOF-1-RuCoO/C.

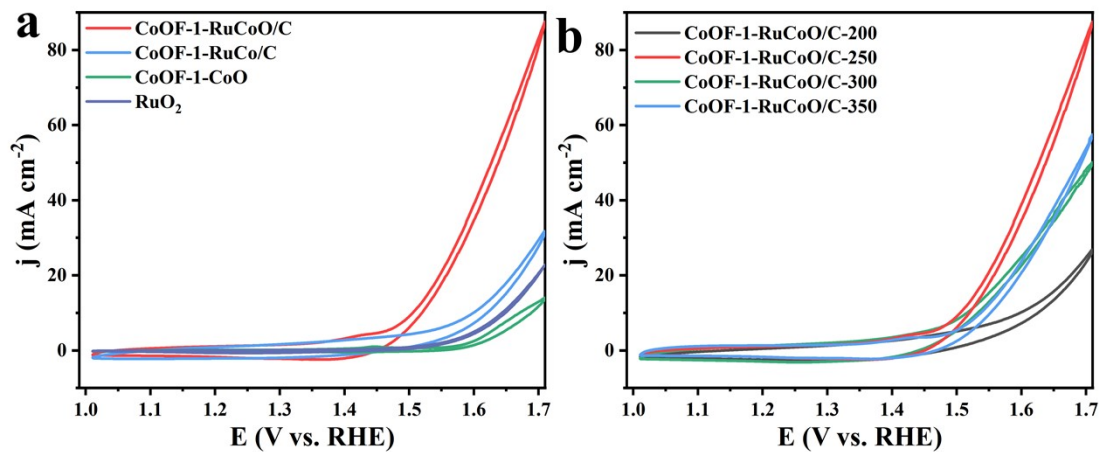

**Fig. S13** Cyclic voltammetry curves of MOF-derived OER catalysts and commercial catalysts.

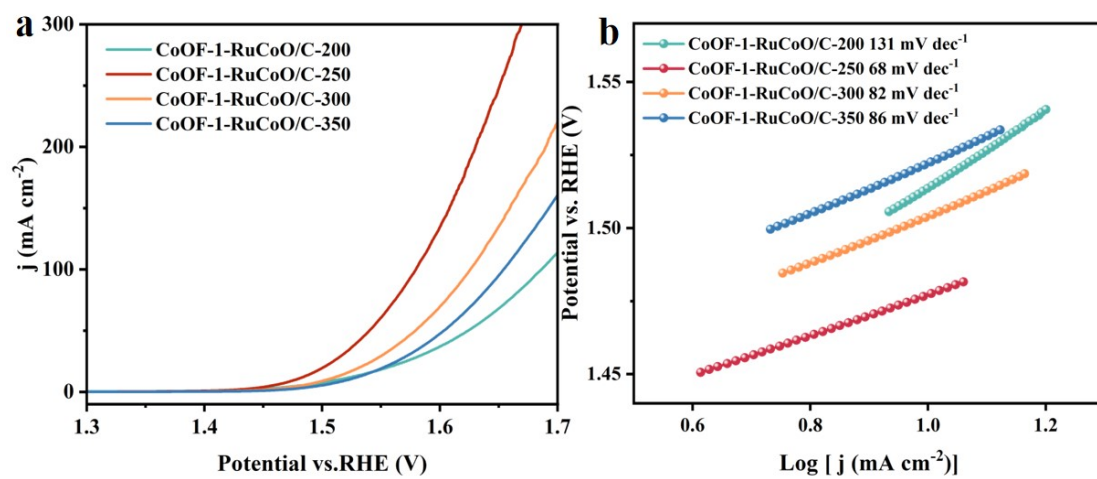

**Fig. S14** Optimization of the OER performance: (a) LSV curves, and (b)

Tafel slopes of CoOF-1-RuCoO/C with different oxidation temperatures.

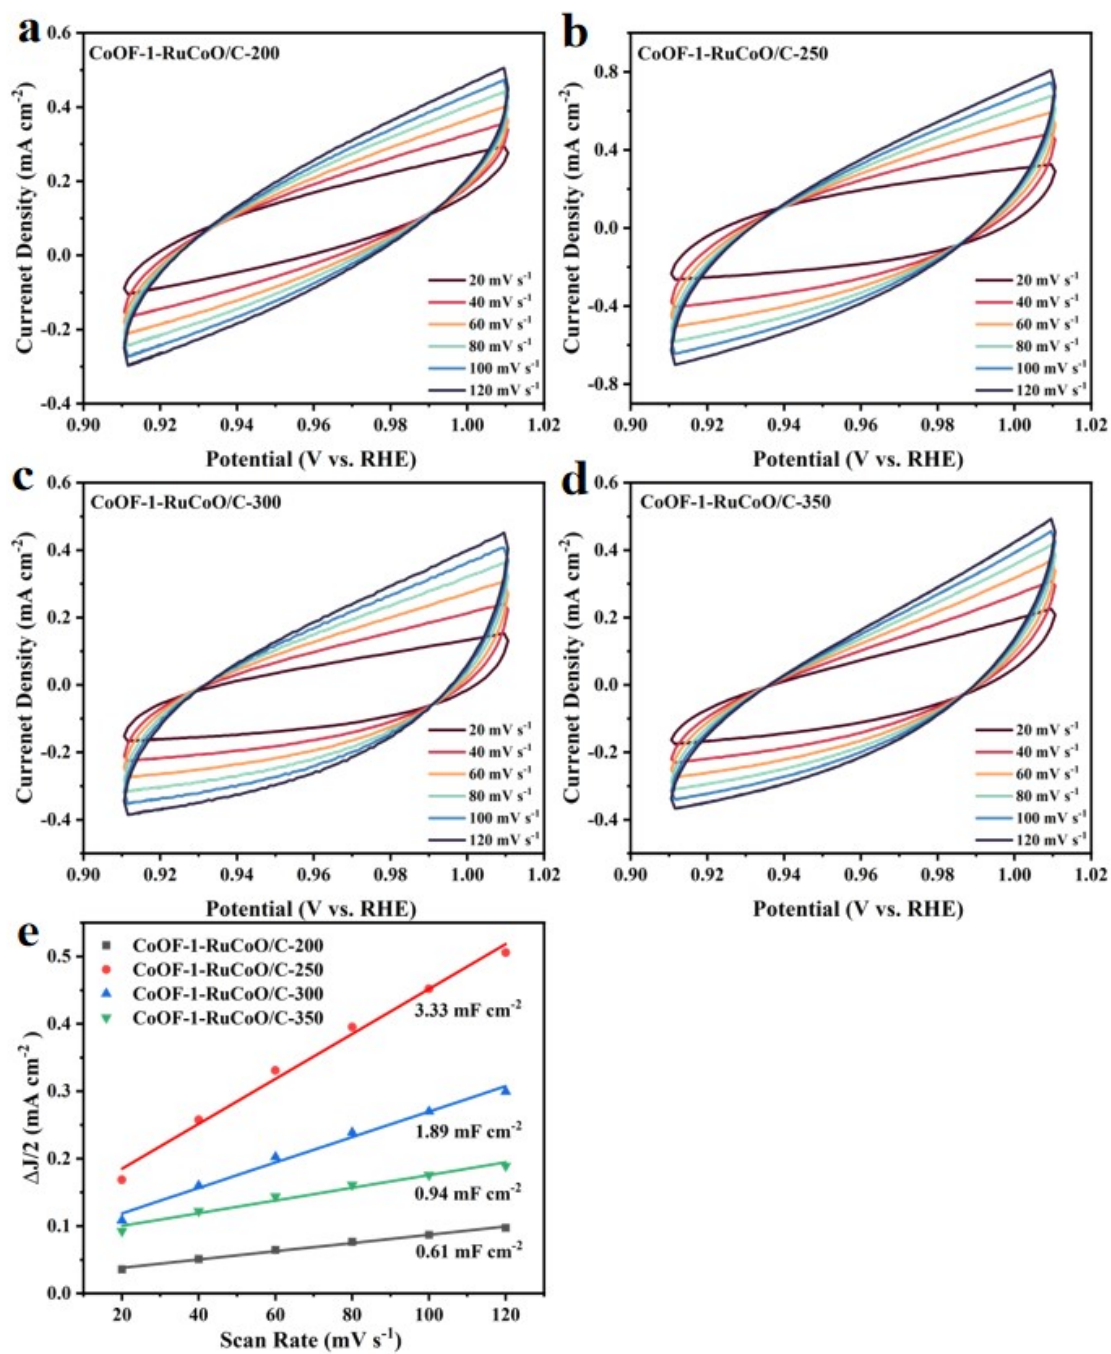

**Fig. S15** Cyclic voltammograms of the CoOF-1-RuCoO/C at the temperatures of (a) 200 °C, (b) 250 °C, (c) 300 °C, (d) 350 °C, and (e) The calculated  $C_{dl}$  profiles.

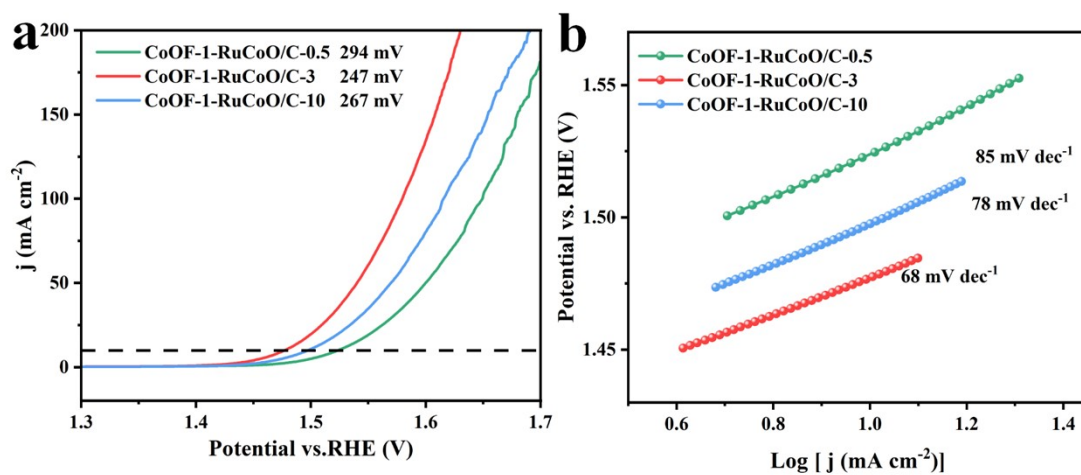

**Fig. S16** Optimization of the OER performance: (a) LSV curves, and (b) Tafel slopes of CoOF-1-RuCoO/C series ( $x = 0.5, 3, 10$ ) with different Ru contents (wt.%).

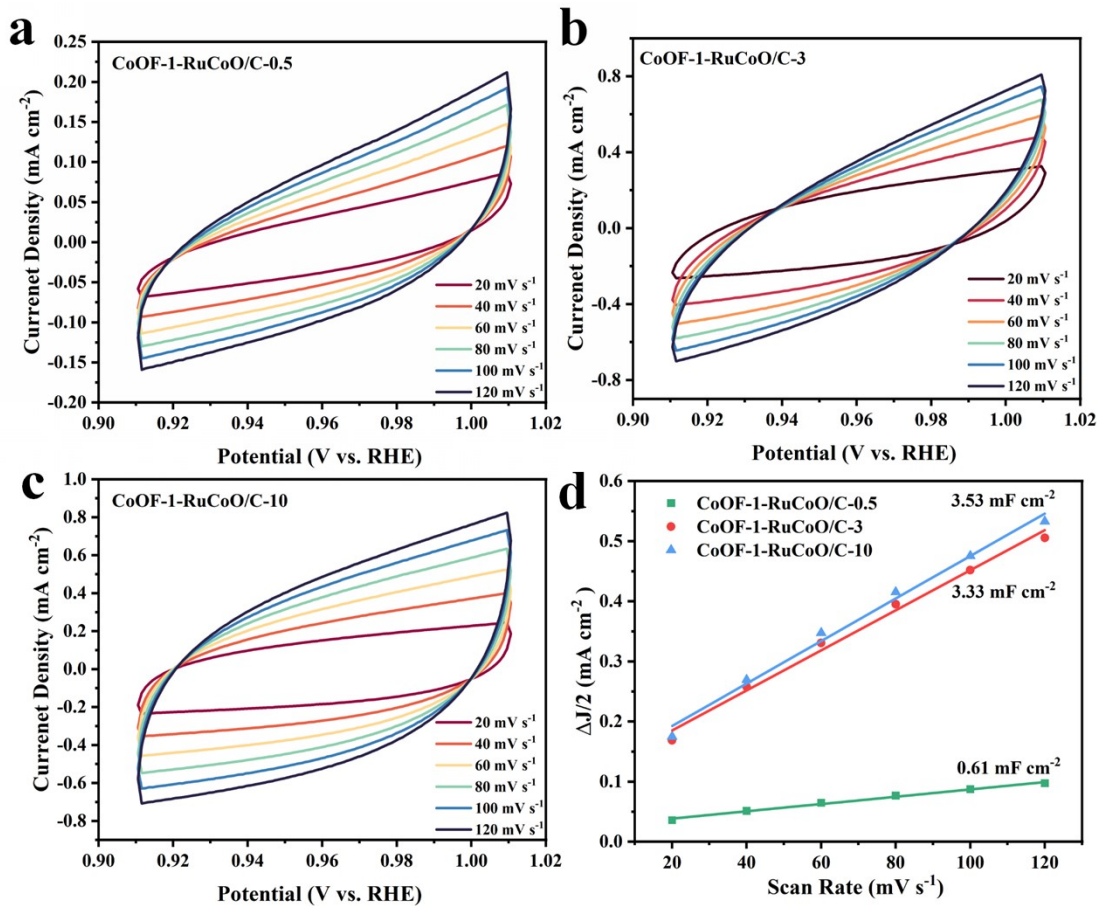

**Fig. S17** CV curves of (a) CoOF-1-RuCoO/C-0.5, (b) CoOF-1-RuCoO/C-3, (c) CoOF-1-RuCoO/C-10 at different scanning rates, and (d) The calculated  $C_{dl}$  profiles.

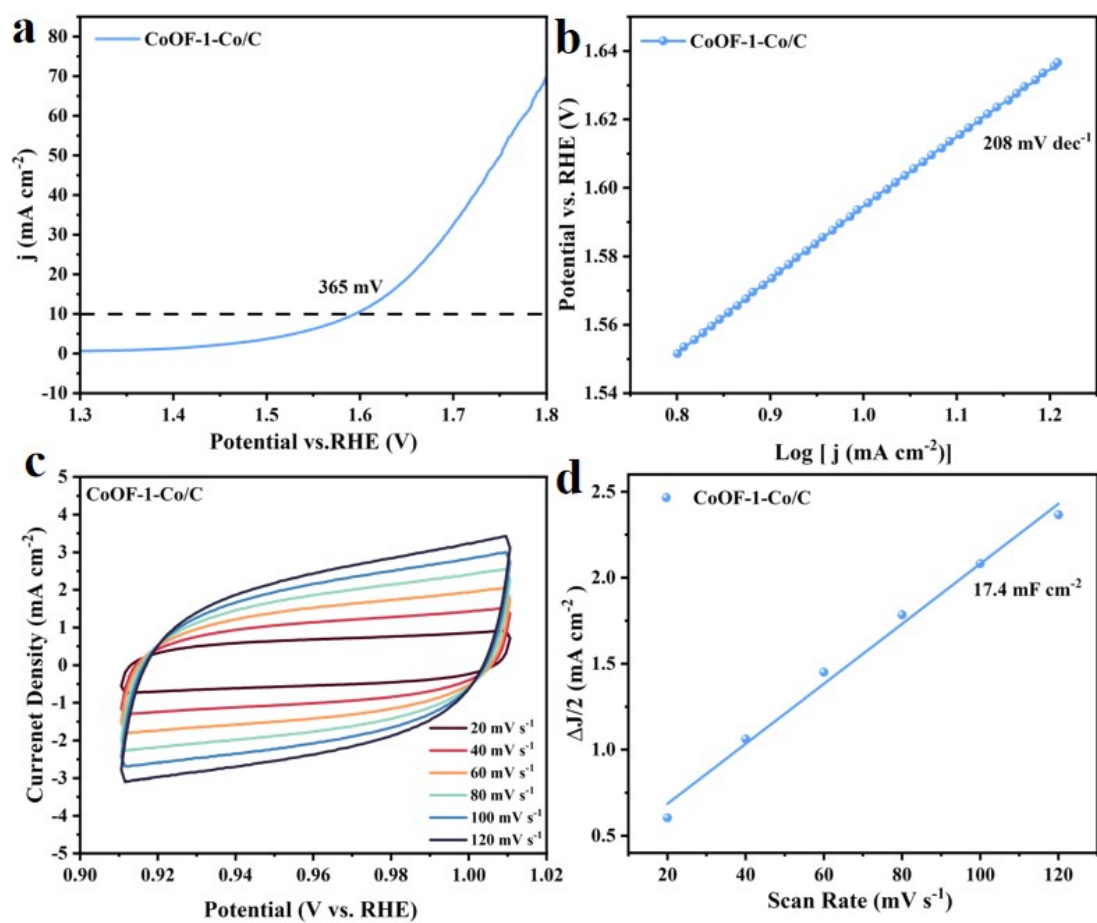

**Fig. S18** (a) LSV curve, (b) Tafel slope, (c) CV curves at different sweep speeds from 20 to 120 mV s<sup>-1</sup> and (d)  $C_{dl}$  profile of CoOF-1-Co/C.

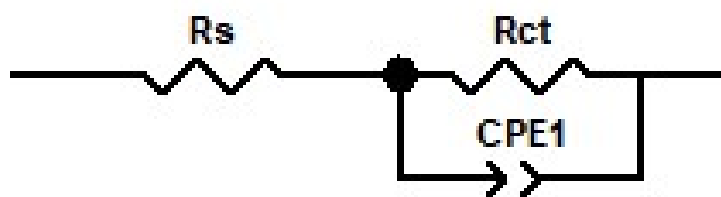

**Fig. S19** The equivalent electrical circuit for EIS data ( $R_s$ : solution resistance;  $R_{ct}$  and  $CPE1$ : resistance and CPE impedance of electrical double layer at the interface of activated product layer and GCE substrate).

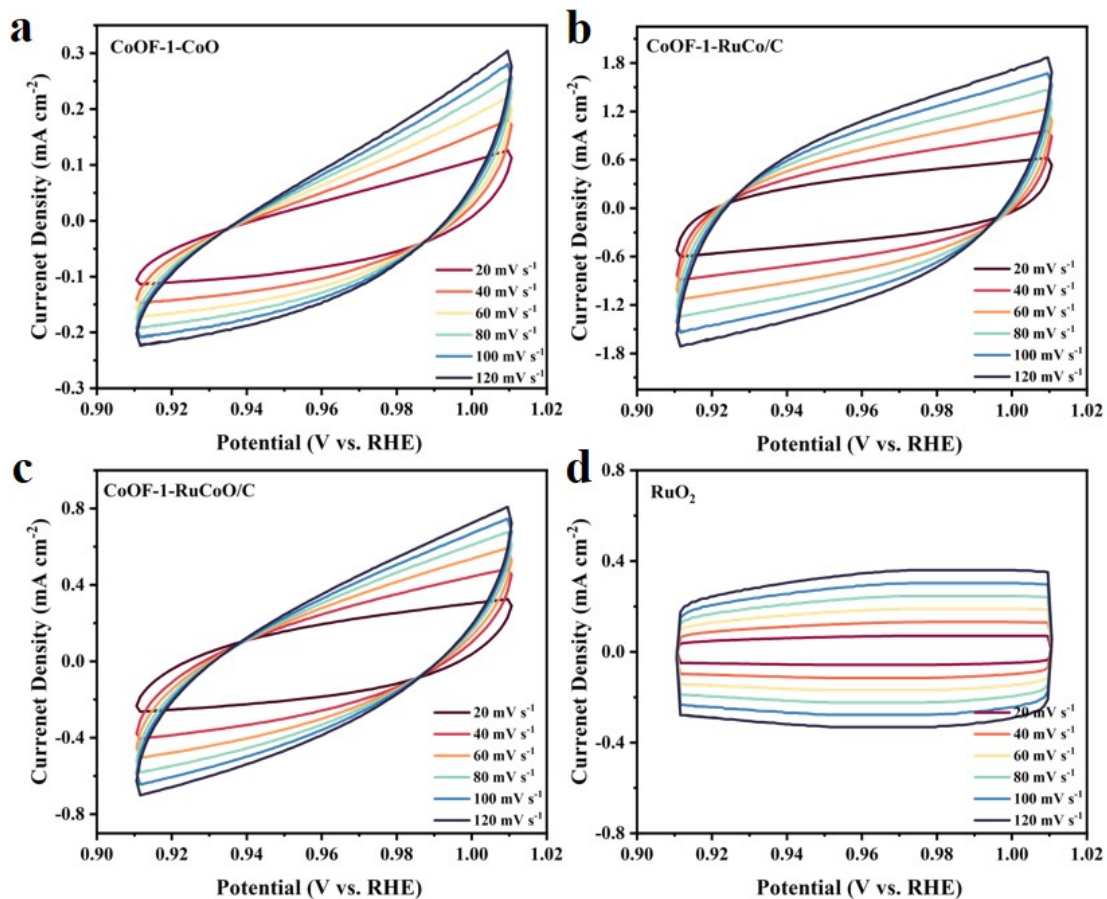

**Fig. S20** The double-layer capacitance ( $C_{dl}$ ) is calculated from the cyclic voltammograms of the (a) CoOF-1-Co/C, (b) CoOF-1-RuCo/C and (c) CoOF-1-RuCoO/C, (d) RuO<sub>2</sub>.

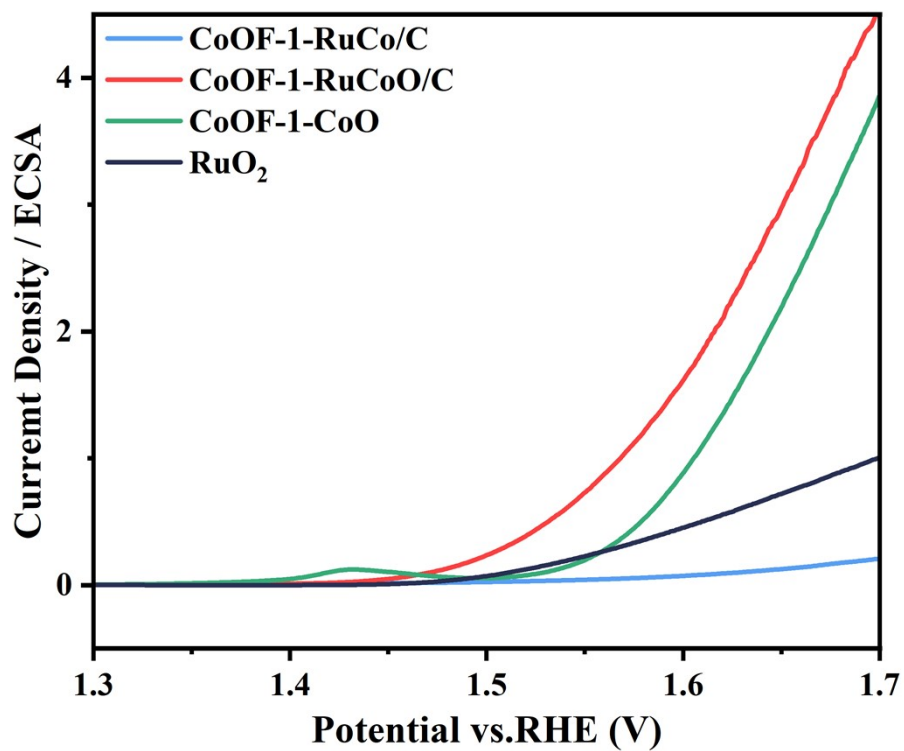

**Fig. S21** The ESCA-normalized LSV curves of various electrocatalysts.

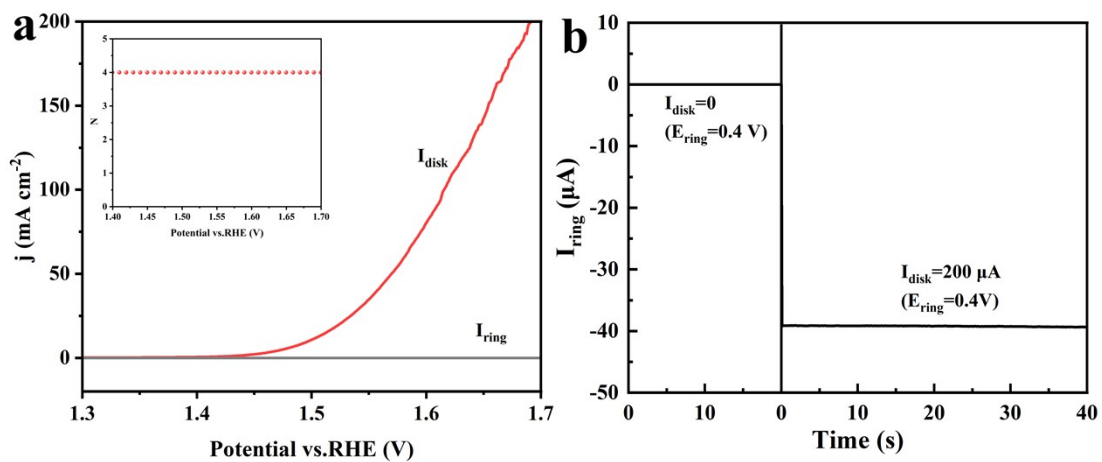

**Fig. S22** (a) RRDE voltammogram and the calculated  $N$  for CoOF-1-RuCoO/C. (b) Ring current of CoOF-1-RuCoO/C.

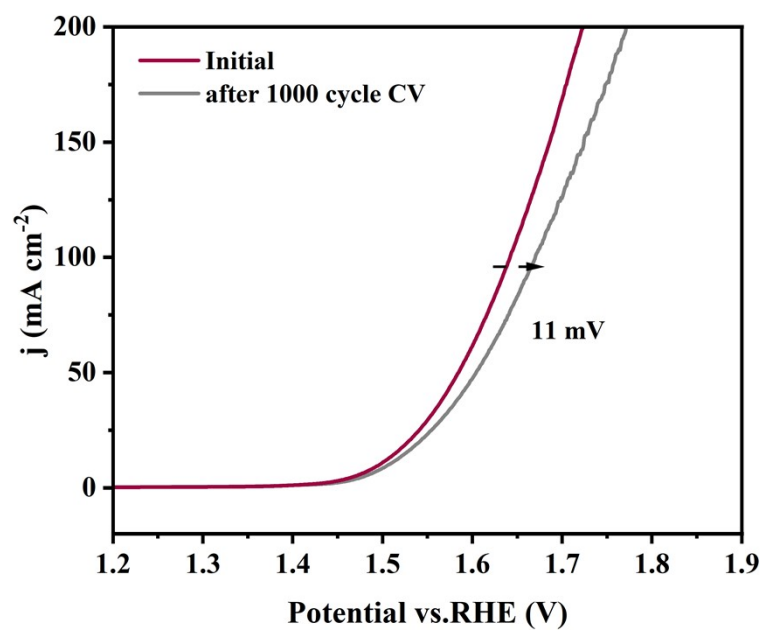

**Fig. S23** LSV curves before and after 1000-cycle CV for CoOF-1-RuCoO/C.

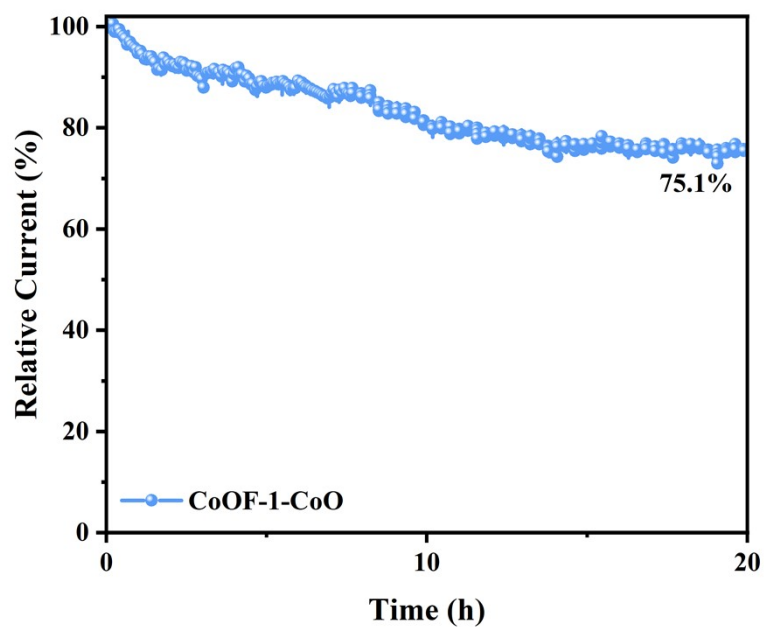

**Fig. S24** The i-t stability test of CoOF-1-CoO.

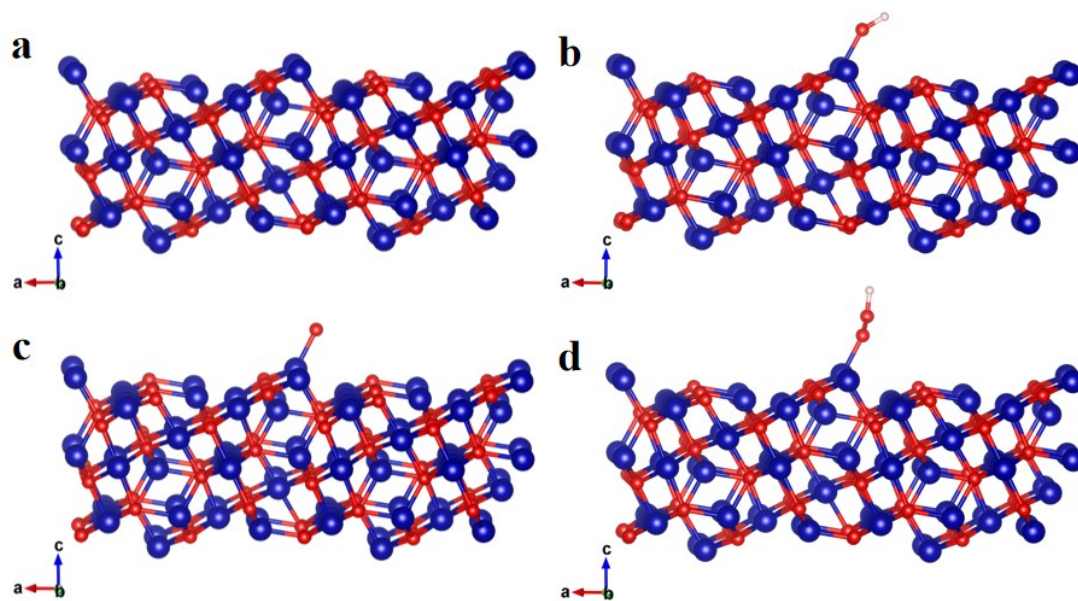

**Fig. S25** The relaxation structure of each intermediate state of  $\text{Co}_3\text{O}_4$  in AEM reaction pathways on Co site.

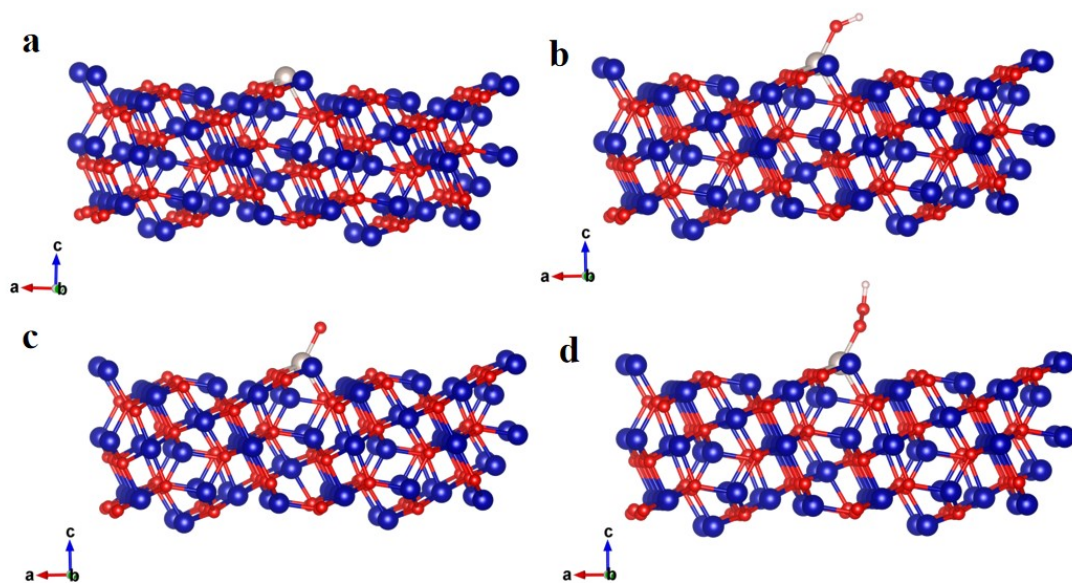

**Fig. S26** The relaxation structure of each intermediate state of Ru-Co<sub>3</sub>O<sub>4</sub> in AEM reaction pathways on Ru site.

For detailed OER procedure (**Figures S20-21**): In step I, the hydroxide ion was first adsorbed on the iron active site and loses one electron to form an adsorbed hydroxyl group. In step II, \*OH was further oxidized and dehydrogenated to generate adsorbed oxygen atoms (\*O) and release water molecules. Subsequently, through steps III-IV, the \*OOH intermediate was formed and eventually desorbed to release oxygen, restoring the catalyst to its initial state.

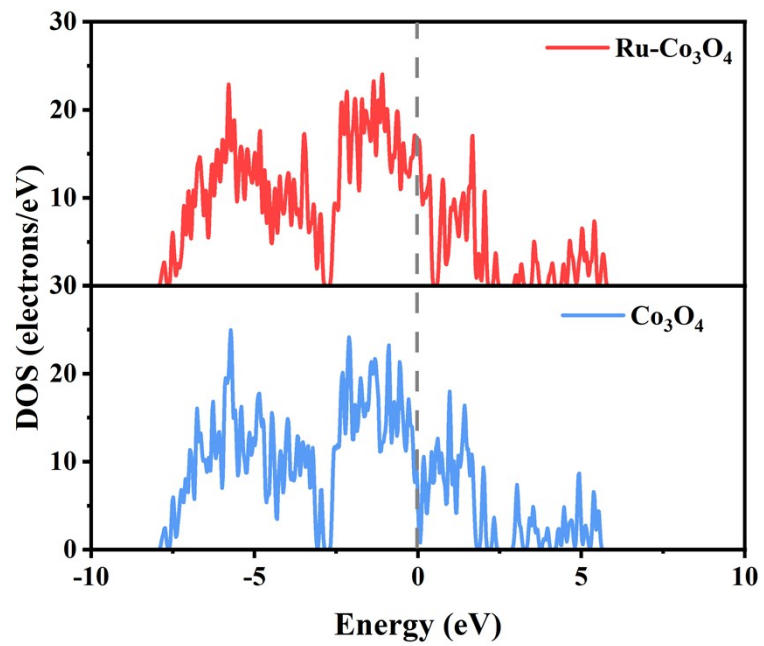

**Fig. S27** DOS profiles of Co<sub>3</sub>O<sub>4</sub> and Ru-Co<sub>3</sub>O<sub>4</sub>.

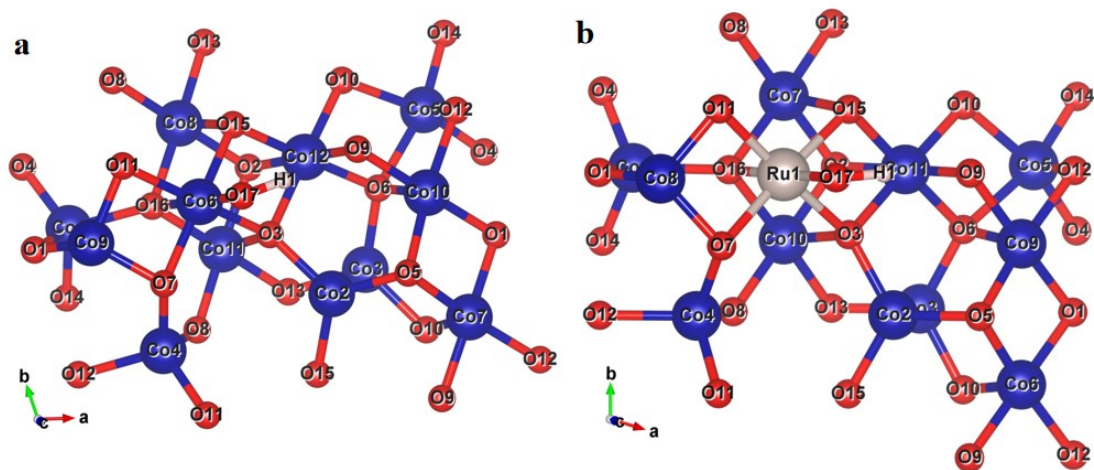

**Fig. S28** Bader charge distribution diagrams of (a)  $\text{Co}_3\text{O}_4$  and (b)  $\text{Ru-Co}_3\text{O}_4$ .

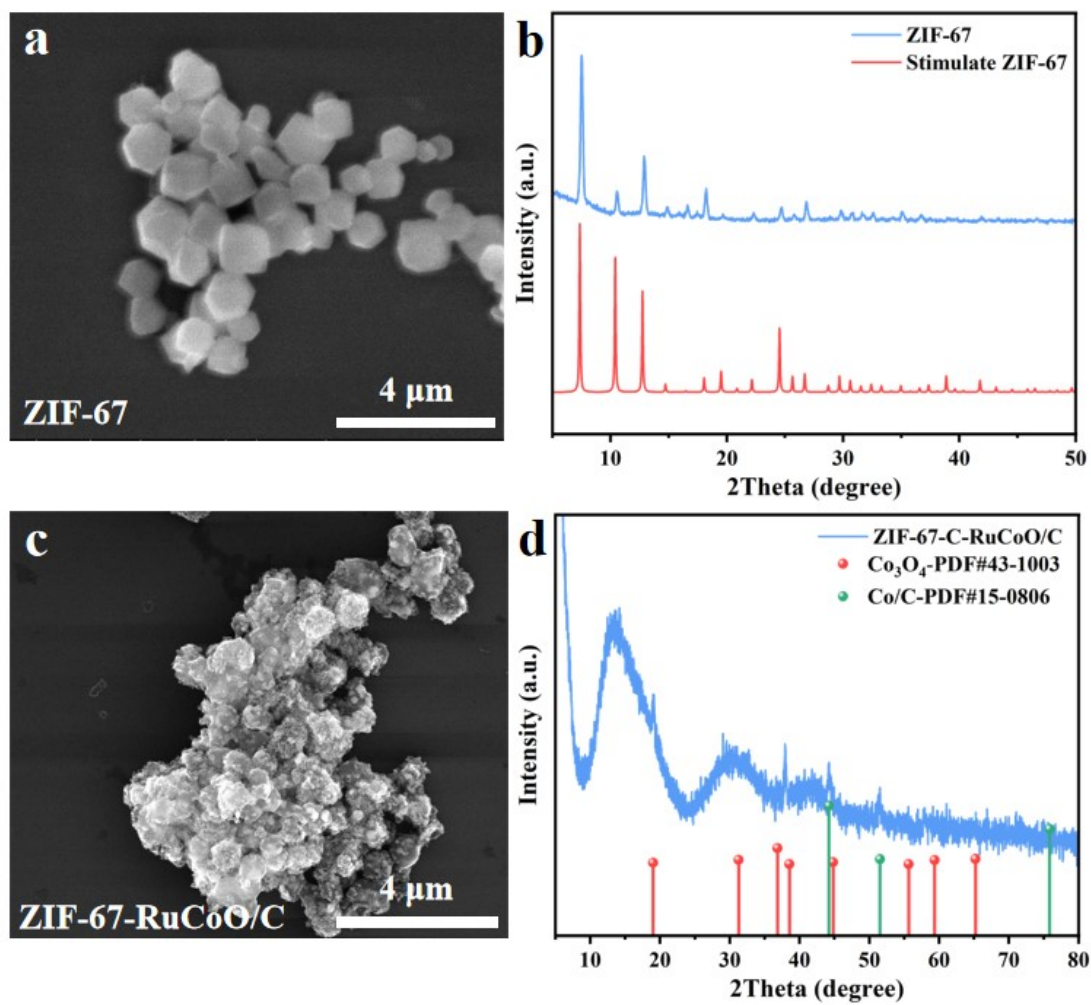

**Fig. S29** (a) SEM image and (b) PXRD pattern of ZIF-67; (c) SEM image and (d) PXRD pattern of ZIF-67-RuCoO/C.

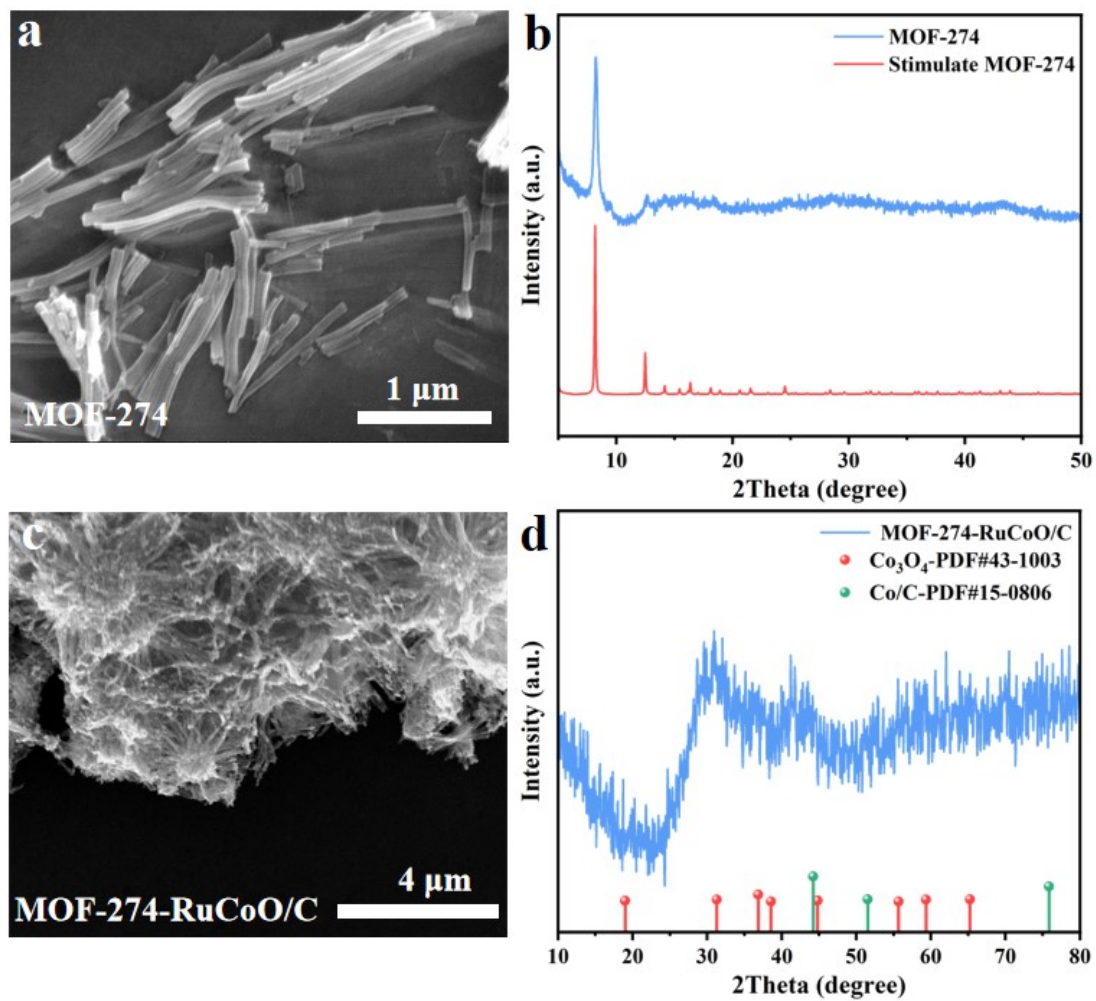

**Fig. S30** (a) SEM image and (b) PXRD pattern of MOF-274; (c) SEM image and (d) PXRD pattern of MOF-274-RuCoO/C.

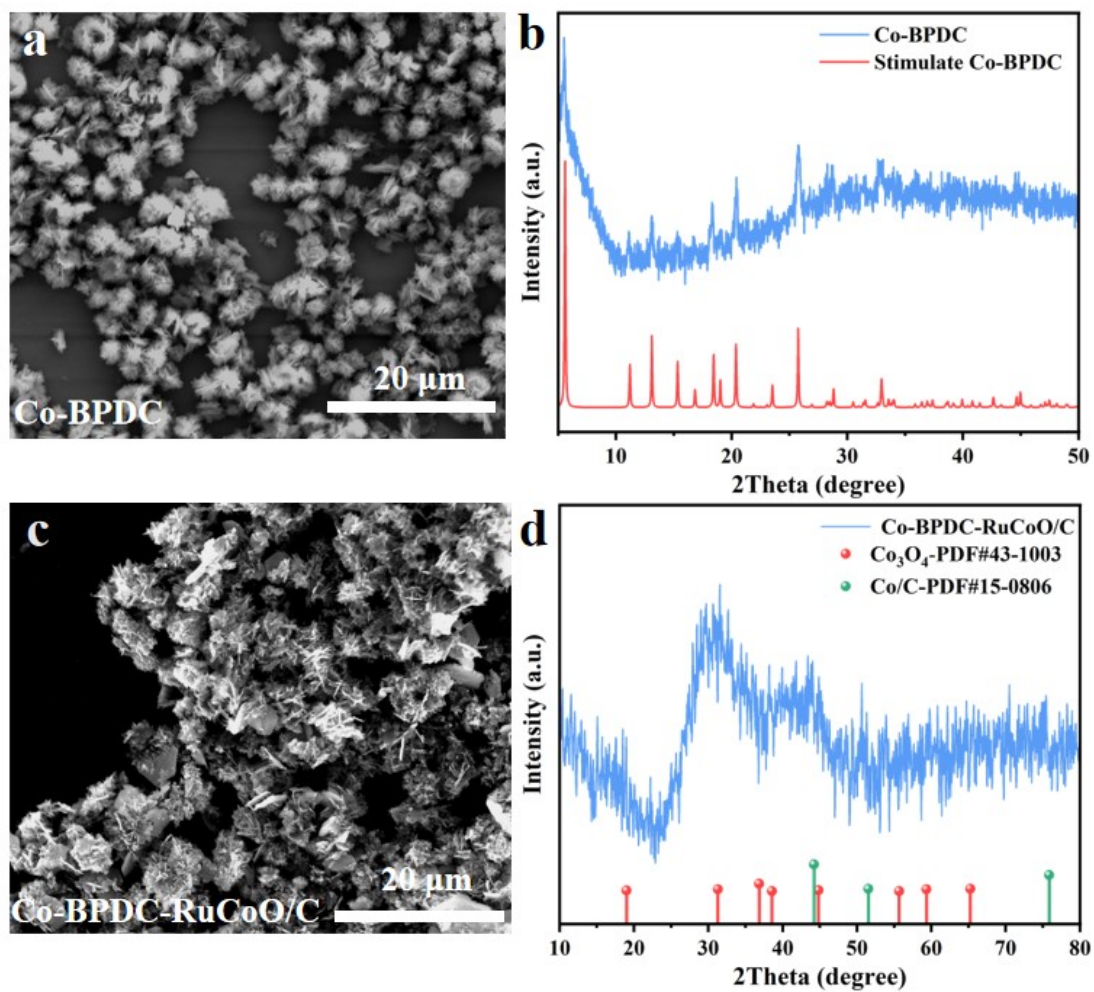

**Fig. S31** (a) SEM image and (b) PXRD pattern of Co-BPDC; (c) SEM image and (d) PXRD pattern of Co-BPDC-RuCoO/C.

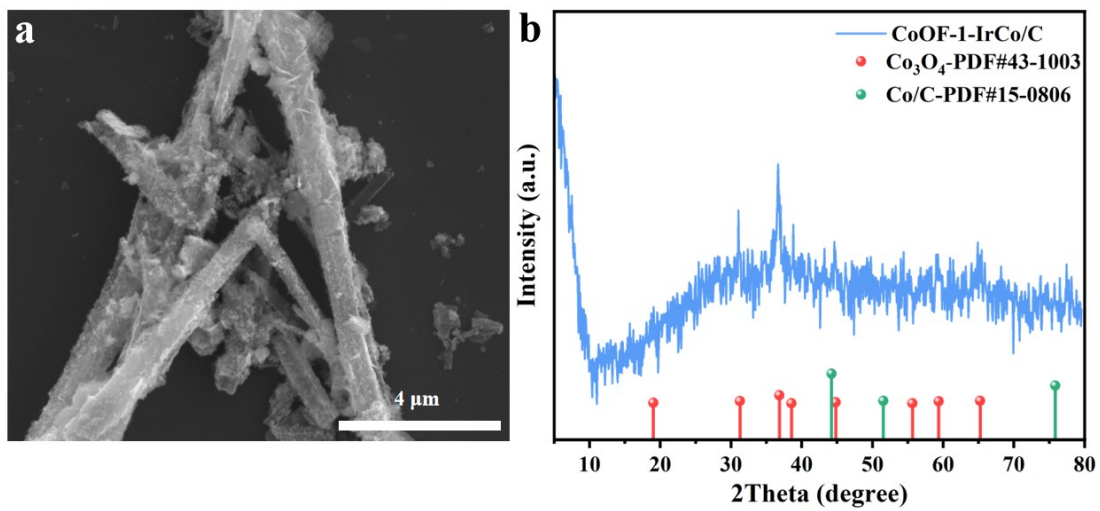

**Fig. S32** (a) SEM image and (b) PXRD pattern of CoOF-1-IrCoO/C.

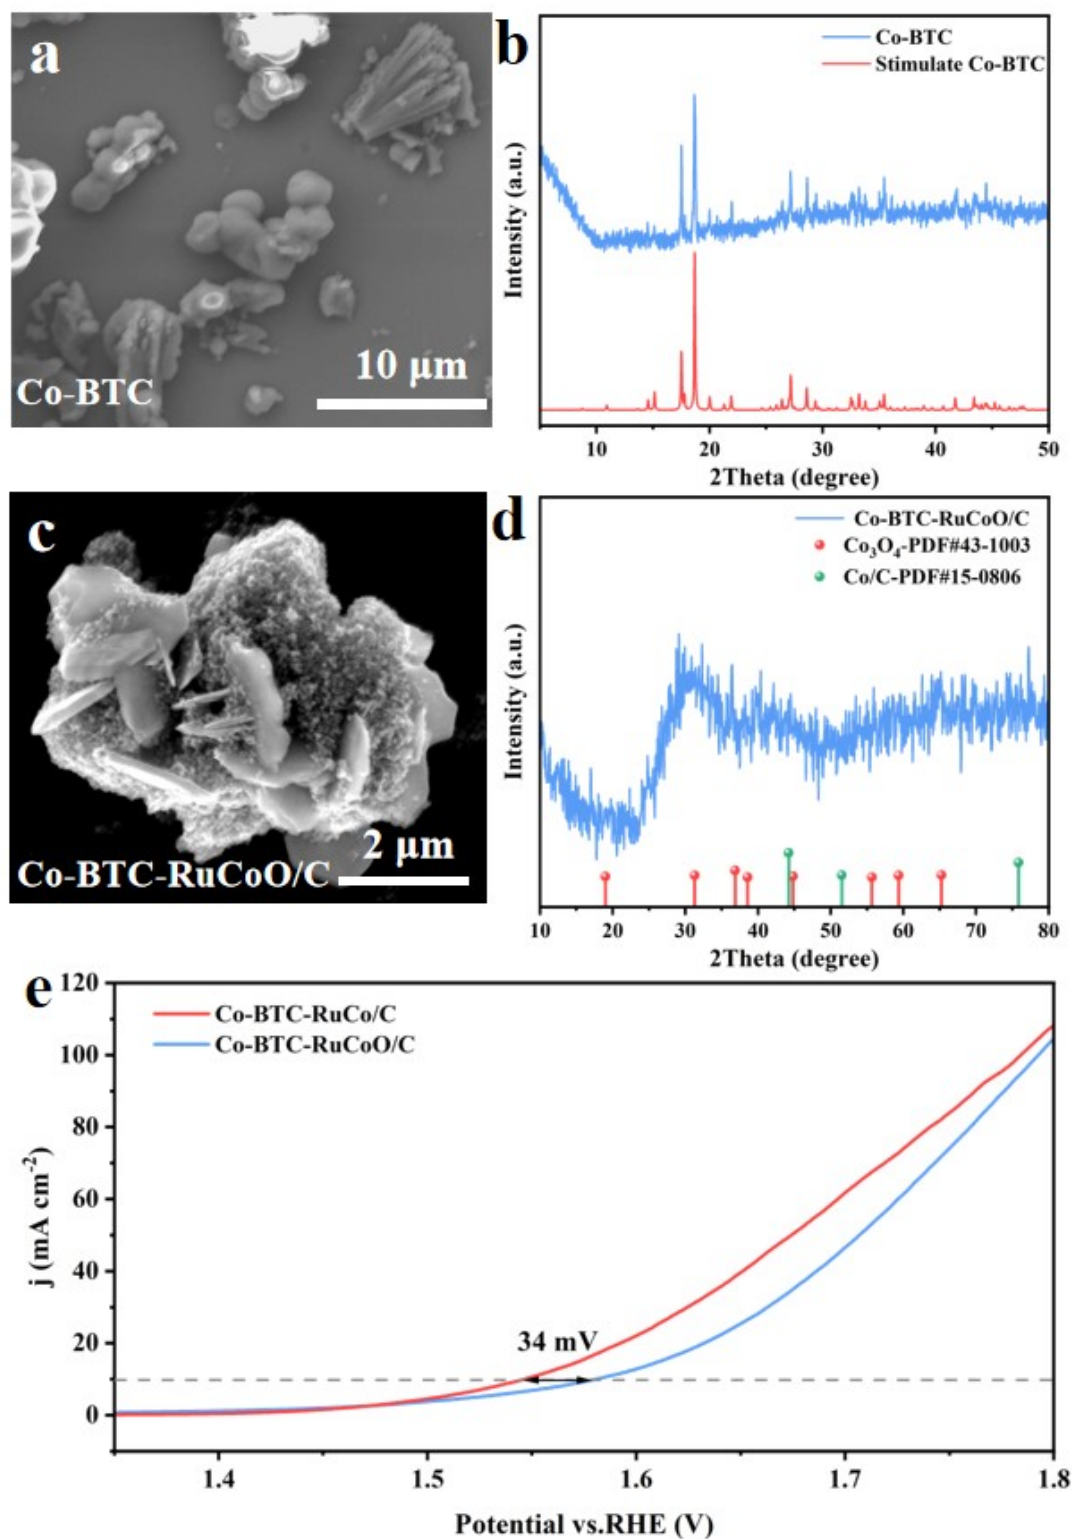

**Fig. S33** (a) SEM image and (b) PXRD patterns of Co-BTC; (c) SEM image and (d) PXRD patterns of Co-BTC-RuCoO/C; (e) LSV curves of the Co-BTC-RuCo/C and Co-BTC-RuCoO/C.

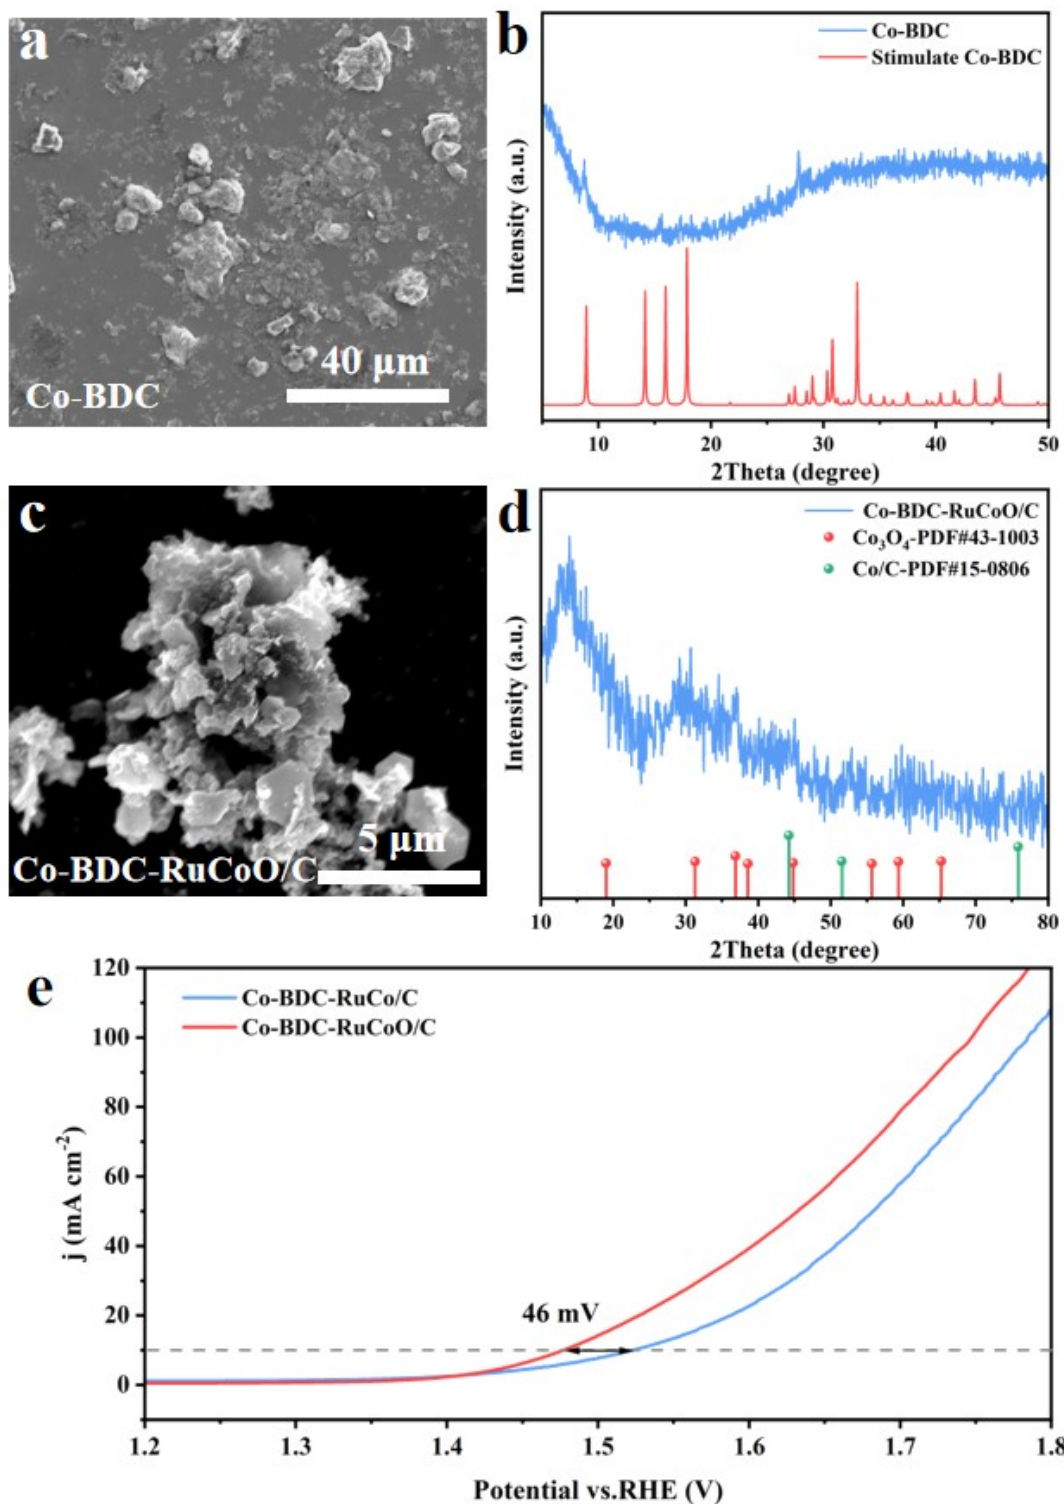

**Fig. S34** (a) SEM image and (b) PXRD pattern of Co-BDC; (c) SEM image and (d) PXRD pattern of Co-BDC-RuCoO/C; (e) LSV curves of the Co-BDC-RuCo/C and Co-BDC-RuCoO/C.

**Table S1 Summary of Crystal Data for CoOF-1.**

| Items                             | CoOF-1 <sup>Ref 1</sup>                                                        |
|-----------------------------------|--------------------------------------------------------------------------------|
| CCDC                              | 1912147                                                                        |
| Formula                           | (C <sub>18</sub> H <sub>8</sub> Co <sub>2</sub> O <sub>12</sub> ) <sub>n</sub> |
| Mass                              | 547.15                                                                         |
| crystal system                    | Tetragonal                                                                     |
| Space group                       | <i>I4<sub>1</sub>22</i>                                                        |
| a(Å)                              | 15.327 (3)                                                                     |
| b(Å)                              | 15.327 (3)                                                                     |
| c(Å)                              | 12.270 (3)                                                                     |
| α(°)                              | 90.00                                                                          |
| β(°)                              | 90.00                                                                          |
| γ(°)                              | 90.00                                                                          |
| V(Å <sup>3</sup> )                | 2882.6 (13)                                                                    |
| T(K)                              | 296                                                                            |
| Z                                 | 8                                                                              |
| F(000)                            | 1128.0                                                                         |
| R <sub>int</sub>                  | 1.158                                                                          |
| R <sub>1</sub> (I>2σ(I))          | 0.0310 (1749)                                                                  |
| wR <sub>2</sub> (all reflections) | 0.0866 (1811)                                                                  |

**Ref 1:** Li Zhong, Junyang Ding, Xian Wang, Lulu Chai, Ting-Ting Li, Kongzhao Su, Yue Hu, Jinjie Qian, Shaoming Huang CCDC 1912147: Experimental Crystal Structure Determination, 2020, DOI: 10.5517/ccdc.csd.cc225r56.

**Table S2 The Content of Ru in CoOF-1-RuCoO/C by ICP-OES Measurement.**

| Catalysts          | Relative content of Ru (wt.%) |
|--------------------|-------------------------------|
| CoOF-1-RuCoO/C-0.5 | 0.58                          |
| CoOF-1-RuCoO/C-3   | 2.92                          |
| CoOF-1-RuCoO/C-10  | 7.85                          |

**Table S3 Micropore Volume, Total Pore Volume and Specific Surface Area over All Prepared Catalysts.**

| Samples        | Micropore<br>volume (cm <sup>3</sup> g <sup>-1</sup> )<br>1) | Total<br>pore volume (cm <sup>3</sup> g <sup>-1</sup> )<br>1) | Specific<br>surface area<br>(m <sup>2</sup> g <sup>-1</sup> ) |
|----------------|--------------------------------------------------------------|---------------------------------------------------------------|---------------------------------------------------------------|
| CoOF-1         | 0.0116                                                       | 0.112                                                         | 46.4                                                          |
| CoOF-1-Co/C    | 0.0693                                                       | 0.342                                                         | 158.5                                                         |
| CoOF-1-RuCo/C  | 0.0675                                                       | 0.370                                                         | 153.0                                                         |
| CoOF-1-RuCoO/C | 0.0548                                                       | 0.373                                                         | 128.0                                                         |
| CoOF-1-CoO     | 0.0145                                                       | 0.138                                                         | 33.7                                                          |

**Table S4 The Deconvolution Data of Co, O, and Ru Atoms in CoOF-1-Co/C, CoOF-1-RuCo/C, and CoOF-1-RuCoO/C.**

| Species                            | CoOF-1-Co/C | CoOF-1-RuCo/C | CoOF-1-RuCoO/C |
|------------------------------------|-------------|---------------|----------------|
| Co <sup>3+</sup> 2p <sub>3/2</sub> | 779.9       | 780.6         | 780.3          |
| Co <sup>2+</sup> 2p <sub>3/2</sub> | 782.6       | 783.5         | 783.2          |
| Co <sup>3+</sup> 2p <sub>1/2</sub> | 795.8       | 796.0         | 795.5          |
| Co <sup>2+</sup> 2p <sub>1/2</sub> | 797.9       | 798.4         | 797.8          |
| O <sub>L</sub>                     | /           | 529.9         | 529.9          |
| O <sub>V</sub>                     | /           | 531.6         | 531.1          |
| O <sub>A</sub>                     | /           | 533.6         | 532.8          |
| C-C/C=C                            | 284.9       | 284.8         | 284.9          |
| C-O                                | 286.9       | 286.9         | 286.9          |
| C=O                                | 289.6       | 289.4         | 289.2          |

**Table S5 The Electrochemical Data of CoOF-1-RuCoO/C Series.**

| <b>Samples</b>   | <b><math>\eta_{10}</math></b> | <b><math>\eta_{50}</math></b> | <b><math>\eta_{100}</math></b> | <b>Tafel slope<br/>(mV dec<sup>-1</sup>)</b> | <b>C<sub>dl</sub> value<br/>(mF cm<sup>-2</sup>)</b> | <b>Charge transfer<br/>resistance<br/>(<math>\Omega</math>)</b> |
|------------------|-------------------------------|-------------------------------|--------------------------------|----------------------------------------------|------------------------------------------------------|-----------------------------------------------------------------|
| CoOF-1-Co/C      | 365                           | 520                           | /                              | 208                                          | 17.4                                                 | /                                                               |
| CoOF-1-RuCo/C    | 340                           | 500                           | 620                            | 211                                          | 7.05                                                 | 21.1                                                            |
| CoOF-1-RuCoO/C   | 247                           | 310                           | 349                            | 68                                           | 3.33                                                 | 25.5                                                            |
| CoOF-1-CoO       | 360                           | 458                           | 555                            | 90                                           | 0.58                                                 | 26.8                                                            |
| RuO <sub>2</sub> | 296                           | 420                           | 544                            | 88                                           | 2.78                                                 | 17.2                                                            |

**Table S6 OER Performance Comparison between CoOF-1-RuCoO/C and Other Electrode Materials.**

| <b>Samples</b>                        | <b>Electrolyte</b> | <b><math>\eta_{10}</math><br/>(mV)</b> | <b>Tafel slope<br/>(mV dec<sup>-1</sup>)</b> | <b>Reference</b>                            |
|---------------------------------------|--------------------|----------------------------------------|----------------------------------------------|---------------------------------------------|
| CoOF-1-RuCoO/C                        | 1.0 M KOH          | 247                                    | 68                                           | <b>This Work</b>                            |
| Ir0.33@Co <sub>3</sub> O <sub>4</sub> | 1.0 M KOH          | 296                                    | 68                                           | ACS Catal., 2022, 12, 13482.                |
| Co <sub>3</sub> O <sub>4</sub> NC     | 1.0 M KOH          | 380                                    | 101                                          | Angew. Chem., Int. Ed., 2020, 59, 7245.     |
| Ir/Co                                 | 1.0 M KOH          | 273                                    | 99                                           | J. Mater. Chem. A 2019, 7, 8376.            |
| IrCo-NC                               | 0.1 M KOH          | 330                                    | 79                                           | ACS Catal. 2021, 11, 8837.                  |
| M-NiO@Co <sub>3</sub> O <sub>4</sub>  | 1.0 M KOH          | 290                                    | 68                                           | Ind. Eng. Chem. Res., 2019, 58, 16581–16587 |
| Ag/Co(OH) <sub>x</sub>                | 1.0 M KOH          | 250                                    | 76                                           | Angew. Chem., Int. Ed., 2020, 59, 7245–7250 |
| Ru-CoO                                | 1.0 M KOH          | 340                                    | 84                                           | J. Alloys Compd. 2023, 960, 170847          |
| RuCoO <sub>x</sub> @Co/N-CNT          | 1.0 M KOH          | 350                                    | 77                                           | J. Mater. Chem. A 2020, 8, 1229-1237        |

|                                                             |           |     |    |                                             |
|-------------------------------------------------------------|-----------|-----|----|---------------------------------------------|
| Ru/Co <sub>3</sub> O <sub>4-x</sub>                         | 1.0 M KOH | 280 | 87 | ACS Catal. 2023,<br>13, 2462-2471           |
| IW-Co <sub>3</sub> O <sub>4</sub> -<br>RuO <sub>2</sub> -HS | 1.0 M KOH | 265 | 55 | Adv. Funct.<br>Mater. 2022, 32,<br>2203206. |
| RuCoOx@NC                                                   | 1.0 M KOH | 255 | 69 | Chem. Eng. J.<br>2023, 475,<br>146441       |

---

**Table S7 Bader Charge Distribution Diagrams of Co<sub>3</sub>O<sub>4</sub> and RuCo<sub>3</sub>O<sub>4</sub>/C.**

| <b>Co<sub>3</sub>O<sub>4</sub></b> | <b>Energy (e)</b> | <b>RuCo<sub>3</sub>O<sub>4</sub>/C</b> | <b>Energy (e)</b> |
|------------------------------------|-------------------|----------------------------------------|-------------------|
| Co1                                | -1.377449         | Co1                                    | -1.319759         |
| Co2                                | -0.935283         | Co2                                    | -0.827613         |
| Co3                                | -1.158593         | Co3                                    | -1.136604         |
| Co4                                | -1.353029         | Co4                                    | -1.320132         |
| Co5                                | -1.401538         | Co5                                    | -1.168776         |
| <b>Co6</b>                         | <b>-1.308412</b>  | Co6                                    | -1.182825         |
| Co7                                | -1.076924         | Co7                                    | -0.306701         |
| Co8                                | -1.258395         | Co8                                    | -0.752725         |
| Co9                                | -0.958133         | Co9                                    | -1.067499         |
| Co10                               | -1.169685         | Co10                                   | -1.139388         |
| Co11                               | -1.332876         | <b>Co11</b>                            | <b>-1.1878</b>    |
| <b>Co12</b>                        | <b>-1.290474</b>  | <b>Ru1</b>                             | <b>-0.885061</b>  |
| O1                                 | 0.868381          | O1                                     | 0.774907          |
| O2                                 | 0.859244          | O2                                     | 0.627941          |
| O3                                 | 0.837765          | O3                                     | 0.722804          |
| O4                                 | 0.801627          | O4                                     | 0.715113          |
| O5                                 | 0.879025          | O5                                     | 0.833117          |
| O6                                 | 0.956388          | O6                                     | 0.897144          |
| O7                                 | 0.894293          | O7                                     | 0.661103          |
| O8                                 | 0.851824          | O8                                     | 0.633296          |

|            |                 |            |                 |
|------------|-----------------|------------|-----------------|
| O9         | 0.830642        | O9         | 0.737062        |
| O10        | 0.991512        | O10        | 0.886793        |
| O11        | 0.860429        | O11        | 0.548148        |
| O12        | 0.939597        | O12        | 0.871593        |
| O13        | 0.942742        | O13        | 0.579494        |
| O14        | 0.830726        | O14        | 0.788807        |
| O15        | 0.877456        | O15        | 0.700038        |
| O16        | 0.977245        | O16        | 0.916769        |
| <b>O17</b> | <b>0.599811</b> | <b>O17</b> | <b>0.613913</b> |
| H1         | -0.177913       | H1         | -0.213159       |

---

**Table S8 The Electrochemical Data of Co-MOF-Ru/IrCoO/C Series.**

| <b>Samples</b>  | <b><math>\eta_{10}</math></b> | <b><math>\eta_{50}</math></b> | <b><math>\eta_{100}</math></b> |
|-----------------|-------------------------------|-------------------------------|--------------------------------|
| ZIF-67-RuCo/C   | 408                           | 563                           | /                              |
| ZIF-67-RuCoO/C  | 299                           | 424                           | 527                            |
| MOF-274-RuCo/C  | 451                           | /                             | /                              |
| MOF-274-RuCoO/C | 348                           | 460                           | 570                            |
| Co-BPDC-RuCo/C  | 423                           | 529                           | /                              |
| Co-BPDC-RuCoO/C | 221                           | 345                           | 458                            |
| Co-BTC-RuCo/C   | 350                           | 477                           | 562                            |
| Co-BTC-RuCoO/C  | 316                           | 446                           | 556                            |
| Co-BDC-RuCo/C   | 293                           | 452                           | 554                            |
| Co-BDC-RuCoO/C  | 247                           | 401                           | 517                            |
| CoOF-1-IrCo/C   | 369                           | 464                           | 547                            |
| CoOF-1-IrCoO/C  | 259                           | 348                           | 433                            |
